# Supplementary material for: Cross-Species Gene Expression Analysis Reveals Gene Modules Implicated in Human Osteosarcoma
Source: PubMed Central journal article supplement (PMC6693360; doi:10.3389/fgene.2019.00697), 2019-08-07
Supplement: Presentation_1.pdf [file Presentation_1.pdf]

## Supplementary Figures

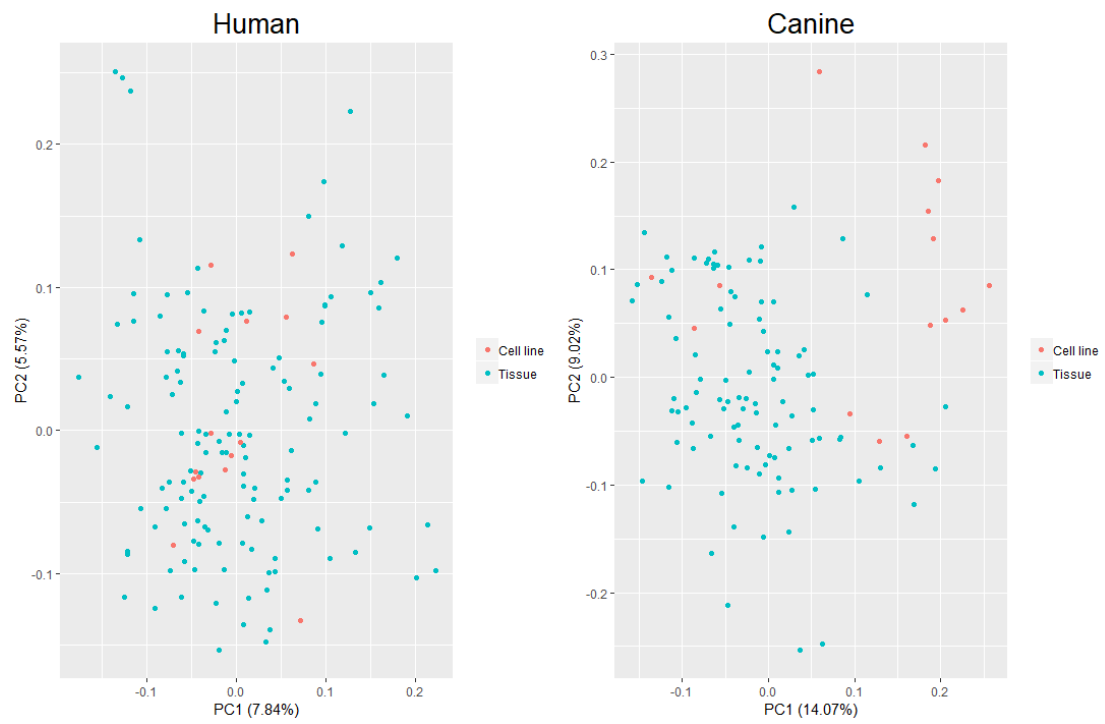

**Supplementary Figure 1:** PCA plot for human and canine expression data.

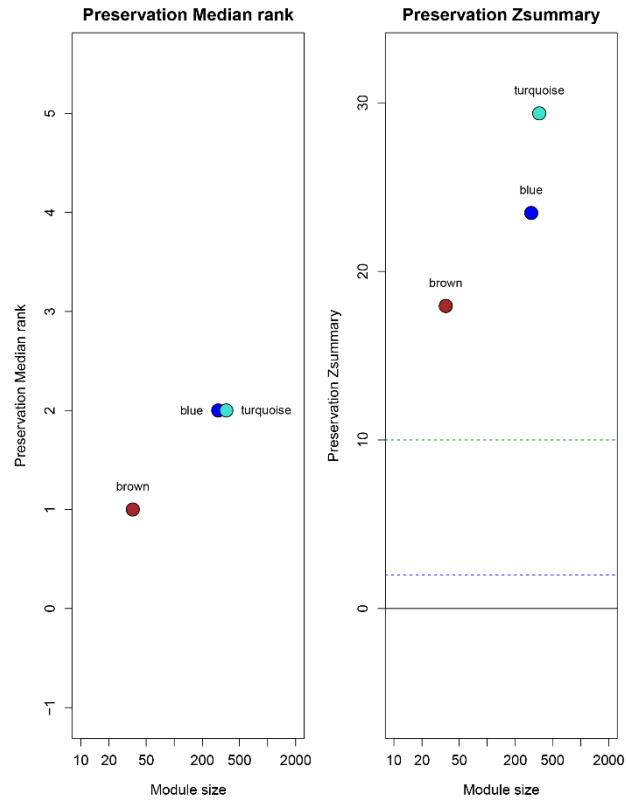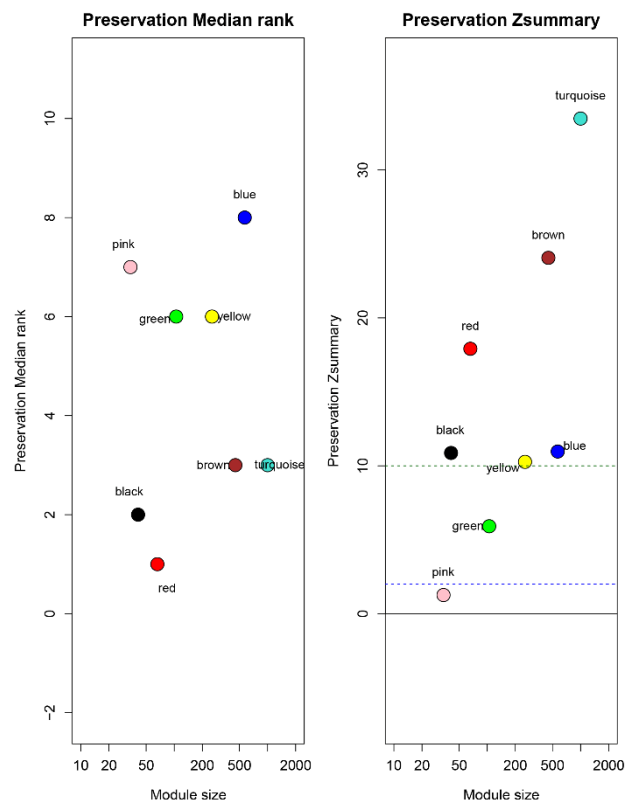

**Supplementary Figure 2:** Preservation test of human modules in canine (top), canine modules in human (bottom).

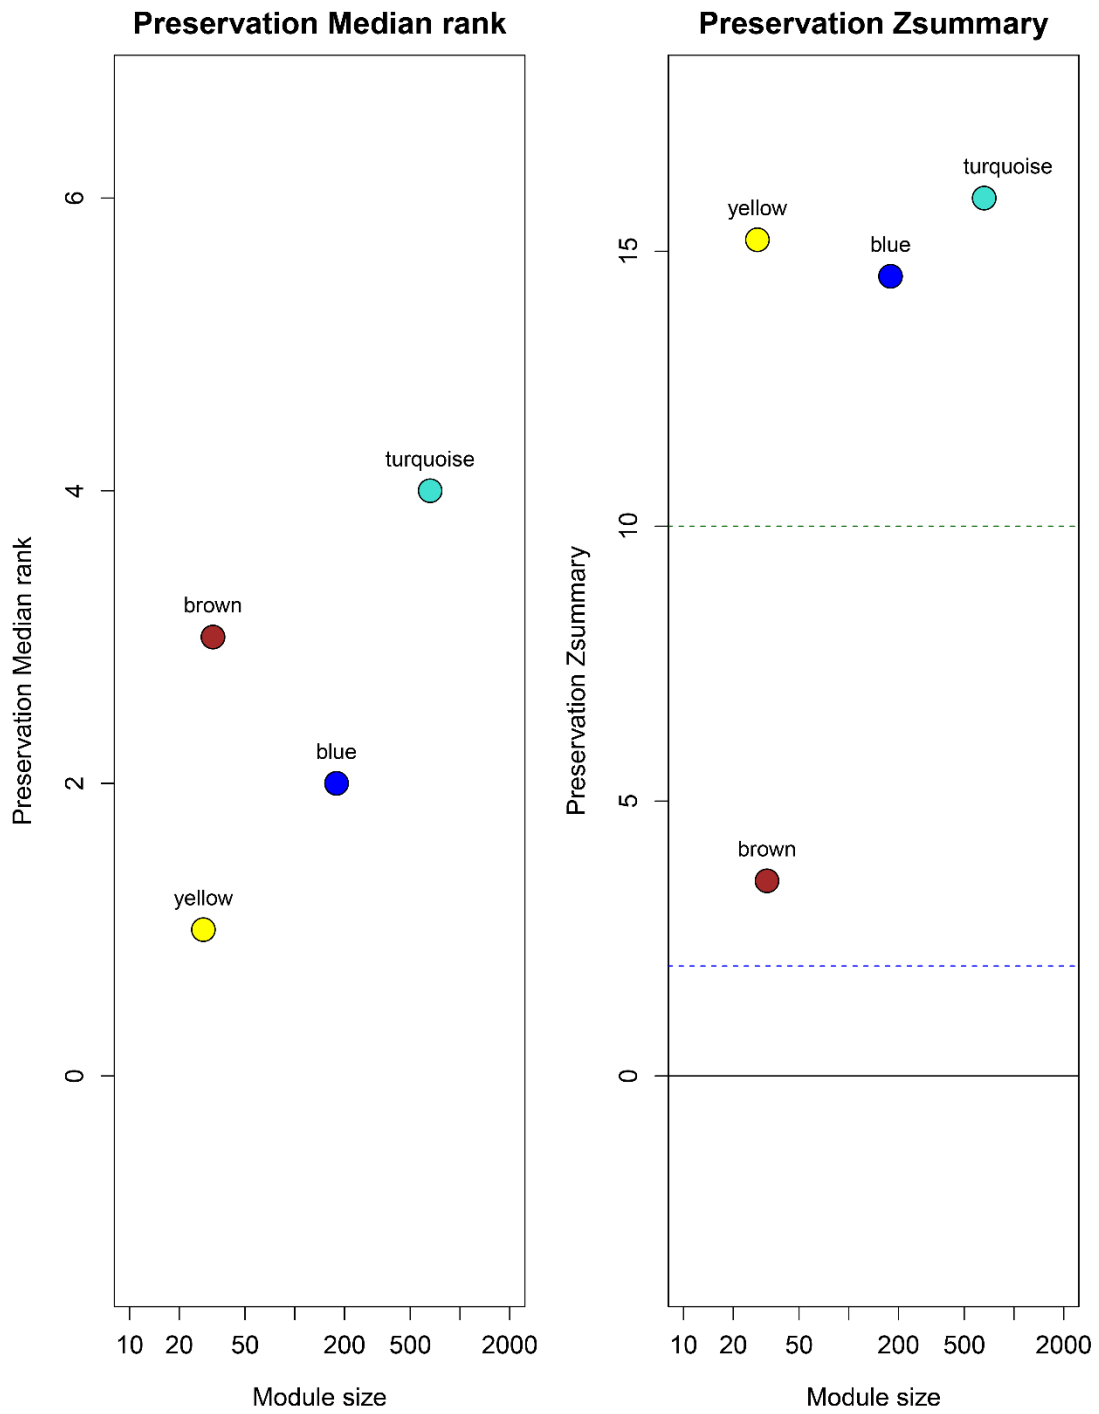

**Supplementary Figure 3:** Preservation test of consensus modules in the test human dataset (Color reference:C1-turquoise, C2-yellow, C3-blue, C4-brown).
