# Supplementary material for: Cross-Species Gene Expression Analysis Reveals Gene Modules Implicated in Human Osteosarcoma
Source: Front Genet. 2019 Aug 7;10:697. doi: 10.3389/fgene.2019.00697 (PMC6693360; doi:10.3389/fgene.2019.00697)
Supplement: Supplementary file 3 [file Datasheet_1.xlsx]

## Sheet: Human_Turquoise_gene(H1)
Ensemble	Gene_Name
ENSG00000124107	SLPI
ENSG00000166888	STAT6
ENSG00000169679	BUB1
ENSG00000129534	MIS18BP1
ENSG00000070087	PFN2
ENSG00000109911	ELP4
ENSG00000058804	NDC1
ENSG00000156469	MTERF3
ENSG00000116830	TTF2
ENSG00000118961	LDAH
ENSG00000166619	BLCAP
ENSG00000197299	BLM
ENSG00000136159	NUDT15
ENSG00000123975	CKS2
ENSG00000144837	PLA1A
ENSG00000131634	TMEM204
ENSG00000136930	PSMB7
ENSG00000171793	CTPS1
ENSG00000239789	MRPS17
ENSG00000127423	AUNIP
ENSG00000177469	CAVIN1
ENSG00000137337	MDC1
ENSG00000115484	CCT4
ENSG00000151287	TEX30
ENSG00000085840	ORC1
ENSG00000213088	ACKR1
ENSG00000211460	TSN
ENSG00000221886	ZBED8
ENSG00000107938	EDRF1
ENSG00000140525	FANCI
ENSG00000143333	RGS16
ENSG00000117748	RPA2
ENSG00000137563	GGH
ENSG00000132773	TOE1
ENSG00000273611	ZNHIT3
ENSG00000173145	NOC3L
ENSG00000147874	HAUS6
ENSG00000100526	CDKN3
ENSG00000124212	PTGIS
ENSG00000137547	MRPL15
ENSG00000111231	GPN3
ENSG00000012048	BRCA1
ENSG00000188153	COL4A5
ENSG00000197694	SPTAN1
ENSG00000051180	RAD51
ENSG00000112081	SRSF3
ENSG00000240583	AQP1
ENSG00000115414	FN1
ENSG00000196502	SULT1A1
ENSG00000145936	KCNMB1
ENSG00000174175	SELP
ENSG00000089685	BIRC5
ENSG00000189159	JPT1
ENSG00000253729	PRKDC
ENSG00000139618	BRCA2
ENSG00000111581	NUP107
ENSG00000111605	CPSF6
ENSG00000166226	CCT2
ENSG00000054611	TBC1D22A
ENSG00000100243	CYB5R3
ENSG00000184983	NDUFA6
ENSG00000100142	POLR2F
ENSG00000138095	LRPPRC
ENSG00000116062	MSH6
ENSG00000085760	MTIF2
ENSG00000014641	MDH1
ENSG00000113522	RAD50
ENSG00000136891	TEX10
ENSG00000196230	TUBB
ENSG00000124767	GLO1
ENSG00000146143	PRIM2
ENSG00000064313	TAF2
ENSG00000156787	TBC1D31
ENSG00000137804	NUSAP1
ENSG00000122566	HNRNPA2B1
ENSG00000164002	EXO5
ENSG00000134697	GNL2
ENSG00000171241	SHCBP1
ENSG00000134744	ZCCHC11
ENSG00000123080	CDKN2C
ENSG00000085999	RAD54L
ENSG00000132780	NASP
ENSG00000070785	EIF2B3
ENSG00000142945	KIF2C
ENSG00000129484	PARP2
ENSG00000075188	NUP37
ENSG00000164162	ANAPC10
ENSG00000164163	ABCE1
ENSG00000105968	H2AFV
ENSG00000155561	NUP205
ENSG00000106462	EZH2
ENSG00000147526	TACC1
ENSG00000109674	NEIL3
ENSG00000079785	DDX1
ENSG00000163029	SMC6
ENSG00000115163	CENPA
ENSG00000115875	SRSF7
ENSG00000152147	GEMIN6
ENSG00000121152	NCAPH
ENSG00000115364	MRPL19
ENSG00000144034	TPRKB
ENSG00000116752	BCAS2
ENSG00000167862	MRPL58
ENSG00000125450	NUP85
ENSG00000142082	SIRT3
ENSG00000175216	CKAP5
ENSG00000014138	POLA2
ENSG00000149823	VPS51
ENSG00000168496	FEN1
ENSG00000123737	EXOSC9
ENSG00000115947	ORC4
ENSG00000126458	RRAS
ENSG00000144744	UBA3
ENSG00000172037	LAMB2
ENSG00000163808	KIF15
ENSG00000186994	KANK3
ENSG00000099622	CIRBP
ENSG00000042429	MED17
ENSG00000077514	POLD3
ENSG00000167325	RRM1
ENSG00000166483	WEE1
ENSG00000185238	PRMT3
ENSG00000102804	TSC22D1
ENSG00000151093	OXSM
ENSG00000163781	TOPBP1
ENSG00000163714	U2SURP
ENSG00000132646	PCNA
ENSG00000088325	TPX2
ENSG00000124207	CSE1L
ENSG00000136108	CKAP2
ENSG00000120699	EXOSC8
ENSG00000133119	RFC3
ENSG00000056050	HPF1
ENSG00000168078	PBK
ENSG00000051825	MPHOSPH9
ENSG00000111445	RFC5
ENSG00000099901	RANBP1
ENSG00000122952	ZWINT
ENSG00000005175	RPAP3
ENSG00000175899	A2M
ENSG00000111669	TPI1
ENSG00000010292	NCAPD2
ENSG00000138160	KIF11
ENSG00000213341	CHUK
ENSG00000119953	SMNDC1
ENSG00000154473	BUB3
ENSG00000121022	COPS5
ENSG00000154582	ELOC
ENSG00000147586	MRPS28
ENSG00000176623	RMDN1
ENSG00000197321	SVIL
ENSG00000068796	KIF2A
ENSG00000113593	PPWD1
ENSG00000051108	HERPUD1
ENSG00000134684	YARS
ENSG00000198492	YTHDF2
ENSG00000117751	PPP1R8
ENSG00000117632	STMN1
ENSG00000125944	HNRNPR
ENSG00000004487	KDM1A
ENSG00000117118	SDHB
ENSG00000166200	COPS2
ENSG00000137876	RSL24D1
ENSG00000157456	CCNB2
ENSG00000140307	GTF2A2
ENSG00000137807	KIF23
ENSG00000145293	ENOPH1
ENSG00000189058	APOD
ENSG00000136518	ACTL6A
ENSG00000113810	SMC4
ENSG00000198721	ECI2
ENSG00000124787	RPP40
ENSG00000111845	PAK1IP1
ENSG00000137210	TMEM14B
ENSG00000124789	NUP153
ENSG00000112312	GMNN
ENSG00000115233	PSMD14
ENSG00000138385	SSB
ENSG00000128654	MTX2
ENSG00000138442	WDR12
ENSG00000023228	NDUFS1
ENSG00000197713	RPE
ENSG00000116750	UCHL5
ENSG00000081721	DUSP12
ENSG00000259494	MRPL46
ENSG00000109685	NSD2
ENSG00000121897	LIAS
ENSG00000109805	NCAPG
ENSG00000178950	GAK
ENSG00000058729	RIOK2
ENSG00000113161	HMGCR
ENSG00000164611	PTTG1
ENSG00000082515	MRPL22
ENSG00000171992	SYNPO
ENSG00000112996	MRPS30
ENSG00000113569	NUP155
ENSG00000113460	BRIX1
ENSG00000113407	TARS
ENSG00000178999	AURKB
ENSG00000141030	COPS3
ENSG00000257017	HP
ENSG00000159713	TPPP3
ENSG00000166508	MCM7
ENSG00000133392	MYH11
ENSG00000102858	MGRN1
ENSG00000117505	DR1
ENSG00000174842	GLMN
ENSG00000097046	CDC7
ENSG00000137947	GTF2B
ENSG00000117133	RPF1
ENSG00000162616	DNAJB4
ENSG00000077254	USP33
ENSG00000142892	PIGK
ENSG00000024526	DEPDC1
ENSG00000117650	NEK2
ENSG00000135829	DHX9
ENSG00000146731	CCT6A
ENSG00000143748	NVL
ENSG00000163468	CCT3
ENSG00000163346	PBXIP1
ENSG00000143621	ILF2
ENSG00000134758	RNF138
ENSG00000101773	RBBP8
ENSG00000167088	SNRPD1
ENSG00000101557	USP14
ENSG00000101624	CEP76
ENSG00000154832	CXXC1
ENSG00000140092	FBLN5
ENSG00000100462	PRMT5
ENSG00000092020	PPP2R3C
ENSG00000100442	FKBP3
ENSG00000100567	PSMA3
ENSG00000100714	MTHFD1
ENSG00000134001	EIF2S1
ENSG00000100632	ERH
ENSG00000197170	PSMD12
ENSG00000108799	EZH1
ENSG00000173801	JUP
ENSG00000094804	CDC6
ENSG00000121058	COIL
ENSG00000108384	RAD51C
ENSG00000172171	TEFM
ENSG00000159842	ABR
ENSG00000174238	PITPNA
ENSG00000004961	HCCS
ENSG00000101868	POLA1
ENSG00000072501	SMC1A
ENSG00000126953	TIMM8A
ENSG00000125351	UPF3B
ENSG00000029993	HMGB3
ENSG00000155959	VBP1
ENSG00000100234	TIMP3
ENSG00000106399	RPA3
ENSG00000094880	CDC23
ENSG00000112511	PHF1
ENSG00000164754	RAD21
ENSG00000091651	ORC6
ENSG00000120802	TMPO
ENSG00000165102	HGSNAT
ENSG00000171848	RRM2
ENSG00000115825	PRKD3
ENSG00000144063	MALL
ENSG00000116874	WARS2
ENSG00000135372	NAT10
ENSG00000030066	NUP160
ENSG00000121671	CRY2
ENSG00000172830	SSH3
ENSG00000175573	C11orf68
ENSG00000110046	ATG2A
ENSG00000164134	NAA15
ENSG00000131018	SYNE1
ENSG00000010319	SEMA3G
ENSG00000001617	SEMA3F
ENSG00000164045	CDC25A
ENSG00000160888	IER2
ENSG00000125835	SNRPB
ENSG00000087586	AURKA
ENSG00000101146	RAE1
ENSG00000164104	HMGB2
ENSG00000076248	UNG
ENSG00000111206	FOXM1
ENSG00000065328	MCM10
ENSG00000120318	ARAP3
ENSG00000181938	GINS3
ENSG00000116478	HDAC1
ENSG00000053372	MRTO4
ENSG00000166133	RPUSD2
ENSG00000104131	EIF3J
ENSG00000138614	INTS14
ENSG00000154719	MRPL39
ENSG00000079308	TNS1
ENSG00000164209	SLC25A46
ENSG00000153140	CETN3
ENSG00000049541	RFC2
ENSG00000229809	ZNF688
ENSG00000122254	HS3ST2
ENSG00000117569	PTBP2
ENSG00000067334	DNTTIP2
ENSG00000036549	ZZZ3
ENSG00000117054	ACADM
ENSG00000119681	LTBP2
ENSG00000119705	SLIRP
ENSG00000100749	VRK1
ENSG00000011260	UTP18
ENSG00000109103	UNC119
ENSG00000154839	SKA1
ENSG00000101945	SUV39H1
ENSG00000184205	TSPYL2
ENSG00000131269	ABCB7
ENSG00000157514	TSC22D3
ENSG00000095002	MSH2
ENSG00000150753	CCT5
ENSG00000084072	PPIE
ENSG00000170860	LSM3
ENSG00000176890	TYMS
ENSG00000135387	CAPRIN1
ENSG00000106554	CHCHD3
ENSG00000100028	SNRPD3
ENSG00000039123	SKIV2L2
ENSG00000141002	TCF25
ENSG00000155304	HSPA13
ENSG00000205581	HMGN1
ENSG00000134690	CDCA8
ENSG00000169139	UBE2V2
ENSG00000106603	COA1
ENSG00000111961	SASH1
ENSG00000197056	ZMYM1
ENSG00000196678	ERI2
ENSG00000164051	CCDC51
ENSG00000166855	CLPX
ENSG00000122390	NAA60
ENSG00000125445	MRPS7
ENSG00000100162	CENPM
ENSG00000136450	SRSF1
ENSG00000092208	GEMIN2
ENSG00000100216	TOMM22
ENSG00000140374	ETFA
ENSG00000138376	BARD1
ENSG00000085733	CTTN
ENSG00000012660	ELOVL5
ENSG00000112208	BAG2
ENSG00000124795	DEK
ENSG00000163026	WDCP
ENSG00000130935	NOL11
ENSG00000109084	TMEM97
ENSG00000177666	PNPLA2
ENSG00000116729	WLS
ENSG00000133773	CCDC59
ENSG00000060688	SNRNP40
ENSG00000132313	MRPL35
ENSG00000164167	LSM6
ENSG00000127463	EMC1
ENSG00000213066	FGFR1OP
ENSG00000197223	C1D
ENSG00000148229	POLE3
ENSG00000137955	RABGGTB
ENSG00000182809	CRIP2
ENSG00000182575	NXPH3
ENSG00000092201	SUPT16H
ENSG00000101138	CSTF1
ENSG00000177054	ZDHHC13

## Sheet: Human_Blue_gene(H2)
Ensemble	Gene_Name
ENSG00000182220	ATP6AP2
ENSG00000180353	HCLS1
ENSG00000136040	PLXNC1
ENSG00000185432	METTL7A
ENSG00000143162	CREG1
ENSG00000126860	EVI2A
ENSG00000204856	FAM216A
ENSG00000166710	B2M
ENSG00000125347	IRF1
ENSG00000027697	IFNGR1
ENSG00000072694	FCGR2B
ENSG00000143226	FCGR2A
ENSG00000166507	NDST2
ENSG00000105967	TFEC
ENSG00000130775	THEMIS2
ENSG00000114686	MRPL3
ENSG00000110799	VWF
ENSG00000153563	CD8A
ENSG00000163131	CTSS
ENSG00000136869	TLR4
ENSG00000100385	IL2RB
ENSG00000135821	GLUL
ENSG00000271503	CCL5
ENSG00000143384	MCL1
ENSG00000095303	PTGS1
ENSG00000175567	UCP2
ENSG00000075624	ACTB
ENSG00000171522	PTGER4
ENSG00000171552	BCL2L1
ENSG00000136634	IL10
ENSG00000118515	SGK1
ENSG00000136689	IL1RN
ENSG00000115091	ACTR3
ENSG00000113732	ATP6V0E1
ENSG00000183486	MX2
ENSG00000157601	MX1
ENSG00000004468	CD38
ENSG00000114013	CD86
ENSG00000160255	ITGB2
ENSG00000150782	IL18
ENSG00000158869	FCER1G
ENSG00000111537	IFNG
ENSG00000102265	TIMP1
ENSG00000134871	COL4A2
ENSG00000146070	PLA2G7
ENSG00000076944	STXBP2
ENSG00000095794	CREM
ENSG00000166825	ANPEP
ENSG00000054983	GALC
ENSG00000003436	TFPI
ENSG00000179163	FUCA1
ENSG00000090339	ICAM1
ENSG00000108691	CCL2
ENSG00000131389	SLC6A6
ENSG00000131981	LGALS3
ENSG00000187098	MITF
ENSG00000168961	LGALS9
ENSG00000162434	JAK1
ENSG00000115956	PLEK
ENSG00000114353	GNAI2
ENSG00000233276	GPX1
ENSG00000275302	CCL4
ENSG00000275385	CCL18
ENSG00000135404	CD63
ENSG00000090382	LYZ
ENSG00000139278	GLIPR1
ENSG00000013503	POLR3B
ENSG00000071073	MGAT4A
ENSG00000116016	EPAS1
ENSG00000119844	AFTPH
ENSG00000204472	AIF1
ENSG00000204267	TAP2
ENSG00000204264	PSMB8
ENSG00000240065	PSMB9
ENSG00000069122	ADGRF5
ENSG00000112367	FIG4
ENSG00000071994	PDCD2
ENSG00000132465	JCHAIN
ENSG00000070669	ASNS
ENSG00000086300	SNX10
ENSG00000131236	CAP1
ENSG00000129538	RNASE1
ENSG00000111670	GNPTAB
ENSG00000197448	GSTK1
ENSG00000133574	GIMAP4
ENSG00000131203	IDO1
ENSG00000168615	ADAM9
ENSG00000198399	ITSN2
ENSG00000084676	NCOA1
ENSG00000265972	TXNIP
ENSG00000106605	BLVRA
ENSG00000127951	FGL2
ENSG00000134575	ACP2
ENSG00000150540	HNMT
ENSG00000123609	NMI
ENSG00000197971	MBP
ENSG00000141664	ZCCHC2
ENSG00000197442	MAP3K5
ENSG00000111817	DSE
ENSG00000172594	SMPDL3A
ENSG00000165140	FBP1
ENSG00000104870	FCGRT
ENSG00000130208	APOC1
ENSG00000090013	BLVRB
ENSG00000011600	TYROBP
ENSG00000004399	PLXND1
ENSG00000197548	ATG7
ENSG00000144746	ARL6IP5
ENSG00000163687	DNASE1L3
ENSG00000178035	IMPDH2
ENSG00000173473	SMARCC1
ENSG00000125730	C3
ENSG00000073921	PICALM
ENSG00000137509	PRCP
ENSG00000165457	FOLR2
ENSG00000136167	LCP1
ENSG00000185896	LAMP1
ENSG00000163513	TGFBR2
ENSG00000166913	YWHAB
ENSG00000196396	PTPN1
ENSG00000186815	TPCN1
ENSG00000183283	DAZAP2
ENSG00000174718	KIAA1551
ENSG00000110848	CD69
ENSG00000177575	CD163
ENSG00000266412	NCOA4
ENSG00000012779	ALOX5
ENSG00000165507	C10orf10
ENSG00000107833	NPM3
ENSG00000148834	GSTO1
ENSG00000197142	ACSL5
ENSG00000148908	RGS10
ENSG00000254087	LYN
ENSG00000099250	NRP1
ENSG00000150093	ITGB1
ENSG00000077420	APBB1IP
ENSG00000095015	MAP3K1
ENSG00000182866	LCK
ENSG00000173372	C1QA
ENSG00000137767	SQOR
ENSG00000104093	DMXL2
ENSG00000169245	CXCL10
ENSG00000138760	SCARB2
ENSG00000064225	ST3GAL6
ENSG00000114491	UMPS
ENSG00000073849	ST6GAL1
ENSG00000124491	F13A1
ENSG00000112799	LY86
ENSG00000138413	IDH1
ENSG00000143149	ALDH9A1
ENSG00000136404	TM6SF1
ENSG00000103811	CTSH
ENSG00000145703	IQGAP2
ENSG00000077585	GPR137B
ENSG00000156515	HK1
ENSG00000197746	PSAP
ENSG00000122359	ANXA11
ENSG00000019582	CD74
ENSG00000082074	FYB1
ENSG00000084234	APLP2
ENSG00000137642	SORL1
ENSG00000167286	CD3D
ENSG00000170296	GABARAP
ENSG00000157873	TNFRSF14
ENSG00000140941	MAP1LC3B
ENSG00000159720	ATP6V0D1
ENSG00000130429	ARPC1B
ENSG00000013364	MVP
ENSG00000188603	CLN3
ENSG00000185883	ATP6V0C
ENSG00000143344	RGL1
ENSG00000188404	SELL
ENSG00000117009	KMO
ENSG00000100600	LGMN
ENSG00000100906	NFKBIA
ENSG00000197249	SERPINA1
ENSG00000140105	WARS
ENSG00000185215	TNFAIP2
ENSG00000271605	MILR1
ENSG00000141293	SKAP1
ENSG00000136436	CALCOCO2
ENSG00000108960	MMD
ENSG00000187239	FNBP1
ENSG00000198951	NAGA
ENSG00000128340	RAC2
ENSG00000043143	JADE2
ENSG00000119321	FKBP15
ENSG00000139318	DUSP6
ENSG00000059378	PARP12
ENSG00000104763	ASAH1
ENSG00000134817	APLNR
ENSG00000149177	PTPRJ
ENSG00000025434	NR1H3
ENSG00000110719	TCIRG1
ENSG00000144118	RALB
ENSG00000093072	ADA2
ENSG00000167613	LAIR1
ENSG00000104894	CD37
ENSG00000105287	PRKD2
ENSG00000105223	PLD3
ENSG00000137486	ARRB1
ENSG00000177105	RHOG
ENSG00000139832	RAB20
ENSG00000131378	RFTN1
ENSG00000174944	P2RY14
ENSG00000088827	SIGLEC1
ENSG00000101347	SAMHD1
ENSG00000198959	TGM2
ENSG00000139514	SLC7A1
ENSG00000164733	CTSB
ENSG00000120899	PTK2B
ENSG00000147416	ATP6V1B2
ENSG00000174600	CMKLR1
ENSG00000185339	TCN2
ENSG00000161638	ITGA5
ENSG00000110934	BIN2
ENSG00000111348	ARHGDIB
ENSG00000138185	ENTPD1
ENSG00000260314	MRC1
ENSG00000107485	GATA3
ENSG00000170525	PFKFB3
ENSG00000113555	PCDH12
ENSG00000121281	ADCY7
ENSG00000162511	LAPTM5
ENSG00000000938	FGR
ENSG00000092445	TYRO3
ENSG00000241839	PLEKHO2
ENSG00000109323	MANBA
ENSG00000136514	RTP4
ENSG00000115267	IFIH1
ENSG00000117091	CD48
ENSG00000091490	SEL1L3
ENSG00000166224	SGPL1
ENSG00000107742	SPOCK2
ENSG00000072786	STK10
ENSG00000211445	GPX3
ENSG00000182578	CSF1R
ENSG00000140968	IRF8
ENSG00000077238	IL4R
ENSG00000140750	ARHGAP17
ENSG00000135823	STX6
ENSG00000162711	NLRP3
ENSG00000129515	SNX6
ENSG00000071246	VASH1
ENSG00000184922	FMNL1
ENSG00000173757	STAT5B
ENSG00000131446	MGAT1
ENSG00000196664	TLR7
ENSG00000165168	CYBB
ENSG00000068323	TFE3
ENSG00000134602	STK26
ENSG00000155962	CLIC2
ENSG00000132530	XAF1
ENSG00000142634	EFHD2
ENSG00000107551	RASSF4
ENSG00000244405	ETV5
ENSG00000119535	CSF3R
ENSG00000033627	ATP6V0A1
ENSG00000101439	CST3
ENSG00000213928	IRF9
ENSG00000155307	SAMSN1
ENSG00000146859	TMEM140
ENSG00000141753	IGFBP4
ENSG00000155926	SLA
ENSG00000148450	MSRB2
ENSG00000168461	RAB31
ENSG00000163453	IGFBP7
ENSG00000166272	WBP1L
ENSG00000089127	OAS1
ENSG00000103966	EHD4
ENSG00000135956	TMEM127
ENSG00000106991	ENG
ENSG00000173221	GLRX
ENSG00000198223	CSF2RA
ENSG00000122862	SRGN
ENSG00000198053	SIRPA
ENSG00000089012	SIRPG
ENSG00000118640	VAMP8
ENSG00000132334	PTPRE
ENSG00000136732	GYPC
ENSG00000125952	MAX
ENSG00000026751	SLAMF7
ENSG00000112149	CD83
ENSG00000166128	RAB8B
ENSG00000261371	PECAM1
ENSG00000071553	ATP6AP1
ENSG00000111335	OAS2
ENSG00000182287	AP1S2
ENSG00000110651	CD81
ENSG00000099785	43161
ENSG00000110876	SELPLG
ENSG00000184371	CSF1
ENSG00000115525	ST3GAL5
ENSG00000136048	DRAM1
ENSG00000160712	IL6R
ENSG00000114978	MOB1A

## Sheet: Human_Brown_gene(H3)
Ensemble	Gene_Name
ENSG00000198838	RYR3
ENSG00000029534	ANK1
ENSG00000166317	SYNPO2L
ENSG00000111245	MYL2
ENSG00000136842	TMOD1
ENSG00000196091	MYBPC1
ENSG00000130595	TNNT3
ENSG00000105048	TNNT1
ENSG00000086967	MYBPC2
ENSG00000104879	CKM
ENSG00000114854	TNNC1
ENSG00000160808	MYL3
ENSG00000172995	ARPP21
ENSG00000148677	ANKRD1
ENSG00000065675	PRKCQ
ENSG00000156219	ART3
ENSG00000172399	MYOZ2
ENSG00000239474	KLHL41
ENSG00000168530	MYL1
ENSG00000077522	ACTN2
ENSG00000177791	MYOZ1
ENSG00000122367	LDB3
ENSG00000108515	ENO3
ENSG00000180209	MYLPF
ENSG00000156885	COX6A2
ENSG00000196296	ATP2A1
ENSG00000101605	MYOM1
ENSG00000124701	APOBEC2
ENSG00000125744	RTN2
ENSG00000101470	TNNC2
ENSG00000081248	CACNA1S
ENSG00000196218	RYR1
ENSG00000133878	DUSP26
ENSG00000173991	TCAP
ENSG00000198125	MB
ENSG00000068976	PYGM

## Sheet: CA_Turquoise_gene(CA1)
Ensemble	Gene_Name
ENSCAFG00000012565	PSMD4
ENSCAFG00000014114	CABYR
ENSCAFG00000015665	EIF2AK1
ENSCAFG00000017662	PTRH2
ENSCAFG00000007062	BUB1
ENSCAFG00000014085	MIS18BP1
ENSCAFG00000001230	GNG5
ENSCAFG00000017140	TOB1
ENSCAFG00000019084	NDC1
ENSCAFG00000004929	TMEM40
ENSCAFG00000018411	NKRF
ENSCAFG00000018722	NDE1
ENSCAFG00000003855	LDAH
ENSCAFG00000016526	INTS1
ENSCAFG00000012385	BLM
ENSCAFG00000018981	C16orf72
ENSCAFG00000008342	AGBL2
ENSCAFG00000030640	PID1
ENSCAFG00000006789	NSFL1C
ENSCAFG00000004403	SNRPD2
ENSCAFG00000028941
ENSCAFG00000013245	GPR19
ENSCAFG00000002194	CKS2
ENSCAFG00000028654	GNG12
ENSCAFG00000020224	PSMB7
ENSCAFG00000008506	TCTN1
ENSCAFG00000008056	RYR3
ENSCAFG00000002551	U2AF2
ENSCAFG00000002990	KIAA0368
ENSCAFG00000001974	KANK1
ENSCAFG00000032205	OSGEP
ENSCAFG00000002732	CTPS1
ENSCAFG00000017705	ARMCX2
ENSCAFG00000014926	DTWD1
ENSCAFG00000010098
ENSCAFG00000010060	RRP9
ENSCAFG00000001952	SEPT10
ENSCAFG00000017510	PSMC1
ENSCAFG00000012751	AUNIP
ENSCAFG00000028879	CAVIN1
ENSCAFG00000014310	APEX2
ENSCAFG00000018493	CD320
ENSCAFG00000005398	PSMC4
ENSCAFG00000016214	MRPL44
ENSCAFG00000011295	PSMB5
ENSCAFG00000013273	E2F2
ENSCAFG00000017832	MYO19
ENSCAFG00000029474	GADD45A
ENSCAFG00000011748	ANP32E
ENSCAFG00000005463	SNX5
ENSCAFG00000003744	ORC1
ENSCAFG00000019027	LDOC1
ENSCAFG00000012625	ADRM1
ENSCAFG00000010451	CALHM2
ENSCAFG00000019345	CTNS
ENSCAFG00000019349	EMC6
ENSCAFG00000005139	JMJD6
ENSCAFG00000023802	ARMCX1
ENSCAFG00000017306	NFATC2IP
ENSCAFG00000012150	CA5B
ENSCAFG00000007174	POLR1B
ENSCAFG00000028571	ZBED8
ENSCAFG00000011620	FANCI
ENSCAFG00000016862	FUS
ENSCAFG00000002154	TLN1
ENSCAFG00000011979	RPA2
ENSCAFG00000009799	NCAPD3
ENSCAFG00000013202	SIDT2
ENSCAFG00000032495	SF3B5
ENSCAFG00000004603	TOE1
ENSCAFG00000017830	ZNHIT3
ENSCAFG00000014897	CDKN3
ENSCAFG00000017869	AATF
ENSCAFG00000012088	TUBGCP4
ENSCAFG00000002424	BZW2
ENSCAFG00000008784	WWP1
ENSCAFG00000017353	SH3BGRL
ENSCAFG00000031447	VAMP3
ENSCAFG00000008064	FAM172A
ENSCAFG00000014600	BRCA1
ENSCAFG00000020049	SPTAN1
ENSCAFG00000010644	PPP3CA
ENSCAFG00000006091	KITLG
ENSCAFG00000017502	ANP32A
ENSCAFG00000017502	ANP32A
ENSCAFG00000004975	RABAC1
ENSCAFG00000010160	TPMT
ENSCAFG00000012050	MCL1
ENSCAFG00000006897	IL6ST
ENSCAFG00000017668	TUBD1
ENSCAFG00000009220	RAD51
ENSCAFG00000013807	TMEM47
ENSCAFG00000001672	LEP
ENSCAFG00000018359	IL13RA1
ENSCAFG00000014245	PDE1A
ENSCAFG00000009289	SRSF6
ENSCAFG00000011911	COL6A1
ENSCAFG00000000136	ATP5B
ENSCAFG00000016493	RPL19
ENSCAFG00000001414	SRSF3
ENSCAFG00000002354	TRIM28
ENSCAFG00000023139	NFE2L1
ENSCAFG00000018183	NPC1
ENSCAFG00000012941	TFRC
ENSCAFG00000018579	GHR
ENSCAFG00000014723	UBA52
ENSCAFG00000009564	ATP2B4
ENSCAFG00000009421	MMP2
ENSCAFG00000002744	SPTBN1
ENSCAFG00000007431	FER
ENSCAFG00000008291
ENSCAFG00000017550	S100A4
ENSCAFG00000000855	IL5
ENSCAFG00000016718	HRH2
ENSCAFG00000015670	PTEN
ENSCAFG00000014345	FN1
ENSCAFG00000008434	ATP2A2
ENSCAFG00000016363	PDPN
ENSCAFG00000006142	DCN
ENSCAFG00000014923	FGF7
ENSCAFG00000016430	LMAN2
ENSCAFG00000017255	RAB11A
ENSCAFG00000013544	HSPB1
ENSCAFG00000016956	KCNMB1
ENSCAFG00000014203	EPO
ENSCAFG00000007153	RAB2A
ENSCAFG00000015013	LGALS3
ENSCAFG00000006496	MITF
ENSCAFG00000005302	BIRC5
ENSCAFG00000003636	FLT3LG
ENSCAFG00000001211	HMGA1
ENSCAFG00000018615	JAK1
ENSCAFG00000010740	GNAI2
ENSCAFG00000012423	CCS
ENSCAFG00000014253	COMT
ENSCAFG00000004722	HN1
ENSCAFG00000006383	BRCA2
ENSCAFG00000000064	CD63
ENSCAFG00000000102
ENSCAFG00000000233	DCTN2
ENSCAFG00000000412	MDM1
ENSCAFG00000000417	NUP107
ENSCAFG00000000424	CPSF6
ENSCAFG00000000432	CCT2
ENSCAFG00000000566	ARSA
ENSCAFG00000000745	TBC1D22A
ENSCAFG00000000856	NUP50
ENSCAFG00000000953	CYB5R3
ENSCAFG00000001437	POLR2F
ENSCAFG00000001526	IFT27
ENSCAFG00000001740	LARGE1
ENSCAFG00000001851	POLR3B
ENSCAFG00000002235	CHST10
ENSCAFG00000002499	DYNC2LI1
ENSCAFG00000002527	LRPPRC
ENSCAFG00000002627	EPAS1
ENSCAFG00000002632	PIGF
ENSCAFG00000002634	SOCS5
ENSCAFG00000002664	MSH6
ENSCAFG00000003137	UGP2
ENSCAFG00000003256	PNO1
ENSCAFG00000000530	SNX2
ENSCAFG00000000930	AFF4
ENSCAFG00000001048	DDX46
ENSCAFG00000001498	MPDZ
ENSCAFG00000001551	PSIP1
ENSCAFG00000002017	FAM214B
ENSCAFG00000002427	TMOD1
ENSCAFG00000002464	ANP32B
ENSCAFG00000002525	COL15A1
ENSCAFG00000002928	SVEP1
ENSCAFG00000002978	LPAR1
ENSCAFG00000000443	TUBB
ENSCAFG00000014672	STIP1
ENSCAFG00000029853	CDKN1A
ENSCAFG00000001614	BYSL
ENSCAFG00000001782	MRPL2
ENSCAFG00000001872	POLR1C
ENSCAFG00000001910	POLH
ENSCAFG00000001922	MAD2L1BP
ENSCAFG00000002413	DST
ENSCAFG00000023267	PRIM2
ENSCAFG00000002655	MTO1
ENSCAFG00000002658	SLC17A5
ENSCAFG00000003024	SYNCRIP
ENSCAFG00000003960	TRAF3IP2
ENSCAFG00000028968	SLC25A32
ENSCAFG00000000663	DCAF13
ENSCAFG00000000670	RIMS2
ENSCAFG00000014268	ENY2
ENSCAFG00000000816	EIF3H
ENSCAFG00000030440	NOV
ENSCAFG00000000974	DERL1
ENSCAFG00000000986	TBC1D31
ENSCAFG00000001445	GRINA
ENSCAFG00000001529	CYC1
ENSCAFG00000001899	COMMD8
ENSCAFG00000002014	USP46
ENSCAFG00000009538	NUSAP1
ENSCAFG00000002913	UTP3
ENSCAFG00000001667	RBM28
ENSCAFG00000002207	TAC1
ENSCAFG00000002856	CYCS
ENSCAFG00000002885	HNRNPA2B1
ENSCAFG00000003216	SEPT7
ENSCAFG00000003553	CADPS2
ENSCAFG00000003048	TRIT1
ENSCAFG00000003289	GNL2
ENSCAFG00000003543	PSMB2
ENSCAFG00000003704	SHCBP1
ENSCAFG00000003803	NRDC
ENSCAFG00000028905	CDKN2C
ENSCAFG00000004272	RAD54L
ENSCAFG00000004517	NASP
ENSCAFG00000004681	EIF2B3
ENSCAFG00000004770	KIF2C
ENSCAFG00000004862	DPH2
ENSCAFG00000005389	PARP2
ENSCAFG00000005657	METTL3
ENSCAFG00000005694	NAP1L1
ENSCAFG00000006163	EEA1
ENSCAFG00000006964	UTP20
ENSCAFG00000007270
ENSCAFG00000007282	NUP37
ENSCAFG00000007476	HCFC2
ENSCAFG00000008681	ETFDH
ENSCAFG00000008691	PPID
ENSCAFG00000008799	TMA16
ENSCAFG00000003411	EZH2
ENSCAFG00000029004
ENSCAFG00000004555	RARRES2
ENSCAFG00000004894	RHEB
ENSCAFG00000004912	PRKAG2
ENSCAFG00000004971	ACTR3B
ENSCAFG00000005876	TACC1
ENSCAFG00000006462	UBXN8
ENSCAFG00000006766	DLC1
ENSCAFG00000006979	MTUS1
ENSCAFG00000007113	PCM1
ENSCAFG00000008123	TENM3
ENSCAFG00000008381	AGA
ENSCAFG00000003259	RNASEH1
ENSCAFG00000003348	MBOAT2
ENSCAFG00000003686	DDX1
ENSCAFG00000003729	SMC6
ENSCAFG00000004457	CENPA
ENSCAFG00000004818	SLC5A6
ENSCAFG00000004923	PPM1G
ENSCAFG00000005253	WDR43
ENSCAFG00000031039	YPEL5
ENSCAFG00000006096	NDUFAF7
ENSCAFG00000029620	SRSF7
ENSCAFG00000029480	GEMIN6
ENSCAFG00000032040	COX7A2L
ENSCAFG00000006560	NCAPH
ENSCAFG00000006776	CIAO1
ENSCAFG00000006790	STARD7
ENSCAFG00000007584	PTCD3
ENSCAFG00000007987	SUCLG1
ENSCAFG00000008175	MRPL19
ENSCAFG00000008402	AUP1
ENSCAFG00000008756	ACTG2
ENSCAFG00000008802	TPRKB
ENSCAFG00000009470	BCAS2
ENSCAFG00000011059	ACP6
ENSCAFG00000012675	SELENBP1
ENSCAFG00000012707	PSMB4
ENSCAFG00000003939	HBP1
ENSCAFG00000030025	FGL2
ENSCAFG00000004638	FDXR
ENSCAFG00000004699	MRPL58
ENSCAFG00000004729	NUP85
ENSCAFG00000005312	PGS1
ENSCAFG00000005614	EIF4A3
ENSCAFG00000005952	DUS1L
ENSCAFG00000007264	CSTF3
ENSCAFG00000007947	SSRP1
ENSCAFG00000009053	CKAP5
ENSCAFG00000009477	EXT2
ENSCAFG00000009691	AP2A2
ENSCAFG00000012434	CTSF
ENSCAFG00000013677	POLA2
ENSCAFG00000015082
ENSCAFG00000015710	UBXN1
ENSCAFG00000030542	FEN1
ENSCAFG00000004151	ANXA5
ENSCAFG00000004253	UGGT1
ENSCAFG00000004927	CCDC93
ENSCAFG00000005113	UBXN4
ENSCAFG00000005178	HNMT
ENSCAFG00000005522	ORC4
ENSCAFG00000000008	TXNL4A
ENSCAFG00000000010	CTDP1
ENSCAFG00000000094	LMAN1
ENSCAFG00000000166
ENSCAFG00000029442	CTGF
ENSCAFG00000000277	CCDC28A
ENSCAFG00000000385	KATNA1
ENSCAFG00000000581	TFB1M
ENSCAFG00000031434	MRPL18
ENSCAFG00000000886	DSE
ENSCAFG00000000939	ASF1A
ENSCAFG00000000989	SERINC1
ENSCAFG00000001344	NAA35
ENSCAFG00000001534	TLE4
ENSCAFG00000001617	VPS13A
ENSCAFG00000001811	ZFAND5
ENSCAFG00000002035	PUM3
ENSCAFG00000002053	RFX3
ENSCAFG00000002301	ECM2
ENSCAFG00000002352	CHMP2A
ENSCAFG00000003502	FUZ
ENSCAFG00000003589	PRMT1
ENSCAFG00000003844	RUVBL2
ENSCAFG00000004180	SAE1
ENSCAFG00000004746	XRCC1
ENSCAFG00000005412	FBL
ENSCAFG00000005931	PSMD8
ENSCAFG00000006601	POLR2I
ENSCAFG00000007095	FXYD1
ENSCAFG00000007258	UBA2
ENSCAFG00000007555	PDCD5
ENSCAFG00000007636	UQCRFS1
ENSCAFG00000005018	ATG7
ENSCAFG00000006541	ARL6IP5
ENSCAFG00000009881	ALAS1
ENSCAFG00000011744	LAMB2
ENSCAFG00000013851	FYCO1
ENSCAFG00000013888
ENSCAFG00000014055	EXOSC7
ENSCAFG00000014112	KIF15
ENSCAFG00000014341	RFXANK
ENSCAFG00000014727	KXD1
ENSCAFG00000016355	DDX39A
ENSCAFG00000017070	TRMT1
ENSCAFG00000017584	SMARCA4
ENSCAFG00000018524	HNRNPM
ENSCAFG00000018610	TRIP10
ENSCAFG00000004593	CCDC90B
ENSCAFG00000004616	RAB30
ENSCAFG00000005402	RPS3
ENSCAFG00000005484	POLD3
ENSCAFG00000005768	FOLR2
ENSCAFG00000005836	RNF121
ENSCAFG00000005945	RRM1
ENSCAFG00000006404	CAVIN3
ENSCAFG00000006488	ILK
ENSCAFG00000006884	EIF3F
ENSCAFG00000006933	TMEM9B
ENSCAFG00000007156	DENND5A
ENSCAFG00000008713	NUCB2
ENSCAFG00000013791	DDX21
ENSCAFG00000004584	TSC22D1
ENSCAFG00000005105	MYCBP2
ENSCAFG00000005465	DZIP1
ENSCAFG00000005480	DNAJC3
ENSCAFG00000005595	FARP1
ENSCAFG00000005809	TM9SF2
ENSCAFG00000006323	LAMP1
ENSCAFG00000005449	TGFBR2
ENSCAFG00000006447	TOPBP1
ENSCAFG00000007664	ZBTB38
ENSCAFG00000008370	RNF13
ENSCAFG00000008603	MBNL1
ENSCAFG00000005420	POLR3F
ENSCAFG00000005520	SNRPB2
ENSCAFG00000005571	NDUFAF5
ENSCAFG00000030748	BTBD3
ENSCAFG00000006030	PCNA
ENSCAFG00000006039	TMEM230
ENSCAFG00000007075	TPX2
ENSCAFG00000007403	CDK5RAP1
ENSCAFG00000007504	AHCY
ENSCAFG00000007932	EDEM2
ENSCAFG00000008000
ENSCAFG00000008790	CTNNBL1
ENSCAFG00000008812	TTI1
ENSCAFG00000009000	ACTR5
ENSCAFG00000009058	TOP1
ENSCAFG00000009336	MYBL2
ENSCAFG00000009591	TOMM34
ENSCAFG00000009615	STK4
ENSCAFG00000011260	CSE1L
ENSCAFG00000011384	DDX27
ENSCAFG00000012011	BMP7
ENSCAFG00000005898	CKAP2
ENSCAFG00000005965	FOXO1
ENSCAFG00000006073	POSTN
ENSCAFG00000006115	EXOSC8
ENSCAFG00000006255	NBEA
ENSCAFG00000006271	RFC3
ENSCAFG00000006538	HSPH1
ENSCAFG00000007679	HPF1
ENSCAFG00000008369
ENSCAFG00000009928	XPO7
ENSCAFG00000010979	ARMC9
ENSCAFG00000023546	TCTN2
ENSCAFG00000007898	CLIP1
ENSCAFG00000008851	HECTD4
ENSCAFG00000009890	RFC5
ENSCAFG00000010389	POP5
ENSCAFG00000014178	RANBP1
ENSCAFG00000014736	CLTCL1
ENSCAFG00000015521	ZWINT
ENSCAFG00000015628	SGMS1
ENSCAFG00000015708	ACTA2
ENSCAFG00000006593	CBX5
ENSCAFG00000025422	DDX23
ENSCAFG00000009729	PUS7L
ENSCAFG00000010901	FAR2
ENSCAFG00000011862	CMAS
ENSCAFG00000013209	HEBP1
ENSCAFG00000025567	A2M
ENSCAFG00000013892	MFAP5
ENSCAFG00000014424
ENSCAFG00000015124	NCAPD2
ENSCAFG00000015320
ENSCAFG00000015576	FKBP4
ENSCAFG00000007114	BMS1
ENSCAFG00000029146	PPP1R3C
ENSCAFG00000007497	KIF11
ENSCAFG00000007893	RBP4
ENSCAFG00000009068	EXOSC1
ENSCAFG00000009624	CWF19L1
ENSCAFG00000009919	NPM3
ENSCAFG00000010040	PPRC1
ENSCAFG00000010354	NT5C2
ENSCAFG00000010411	PDCD11
ENSCAFG00000010483	STN1
ENSCAFG00000011991	RAB11FIP2
ENSCAFG00000012494	TACC2
ENSCAFG00000012700	BUB3
ENSCAFG00000008393	MRPS28
ENSCAFG00000003987	JCAD
ENSCAFG00000004023	ZEB1
ENSCAFG00000004586	RSU1
ENSCAFG00000004696
ENSCAFG00000004769	OPTN
ENSCAFG00000005206	RBM17
ENSCAFG00000005392	PITRM1
ENSCAFG00000005536	GTPBP4
ENSCAFG00000006241	RNF14
ENSCAFG00000006249	NDFIP1
ENSCAFG00000006293	NR3C1
ENSCAFG00000008081	TNPO1
ENSCAFG00000008720	POLR2C
ENSCAFG00000008740	CIAPIN1
ENSCAFG00000008980	HERPUD1
ENSCAFG00000009088	NUP93
ENSCAFG00000009500	AKTIP
ENSCAFG00000009654	RBL2
ENSCAFG00000009946	HEATR3
ENSCAFG00000010010	N4BP1
ENSCAFG00000010225	PHKB
ENSCAFG00000010390	AK2
ENSCAFG00000029191	STMN1
ENSCAFG00000013220
ENSCAFG00000013220
ENSCAFG00000013308	HNRNPR
ENSCAFG00000013361	KDM1A
ENSCAFG00000015832	SDHB
ENSCAFG00000009322	DNAJC17
ENSCAFG00000013769
ENSCAFG00000014548	FBN1
ENSCAFG00000016600	CCNB2
ENSCAFG00000017535	KIF23
ENSCAFG00000017833	CCDC33
ENSCAFG00000017977	COX5A
ENSCAFG00000008512	GABPA
ENSCAFG00000008687	CCT8
ENSCAFG00000010572
ENSCAFG00000010621	RRP1B
ENSCAFG00000008449	USO1
ENSCAFG00000008611	SCARB2
ENSCAFG00000025045	HNRNPD
ENSCAFG00000010071	PDLIM5
ENSCAFG00000010517	SLC35A5
ENSCAFG00000011204	NDUFB4
ENSCAFG00000011637	IQCB1
ENSCAFG00000012401	UMPS
ENSCAFG00000011364	ACTL6A
ENSCAFG00000012444	ALG3
ENSCAFG00000012608	PSMD2
ENSCAFG00000013919	LPP
ENSCAFG00000013985	P3H2
ENSCAFG00000014295	SMC4
ENSCAFG00000009688	PAK1IP1
ENSCAFG00000009853	RANBP9
ENSCAFG00000010146	NUP153
ENSCAFG00000010440	GMNN
ENSCAFG00000009922	RBMS1
ENSCAFG00000012418	SSB
ENSCAFG00000013366
ENSCAFG00000014233	SSFA2
ENSCAFG00000014812	COL3A1
ENSCAFG00000014837	COL5A2
ENSCAFG00000012519	WDR12
ENSCAFG00000014876	BCS1L
ENSCAFG00000015182	GLB1L
ENSCAFG00000029045	ACSL3
ENSCAFG00000011275	MARK1
ENSCAFG00000012754	UFC1
ENSCAFG00000013180	DDR2
ENSCAFG00000011376	AKAP13
ENSCAFG00000011492	MRPL46
ENSCAFG00000012639	IQGAP1
ENSCAFG00000013288	ADAMTSL3
ENSCAFG00000014166	IDH3A
ENSCAFG00000014730	NOP14
ENSCAFG00000014951	NSD2
ENSCAFG00000015321	FBXL5
ENSCAFG00000016068	RFC1
ENSCAFG00000016161	FAM114A1
ENSCAFG00000016387	RBPJ
ENSCAFG00000016677	NCAPG
ENSCAFG00000007854	CAST
ENSCAFG00000008410	RASA1
ENSCAFG00000008677	SSBP2
ENSCAFG00000012118	URB2
ENSCAFG00000012151	NUP133
ENSCAFG00000012991	ARID5B
ENSCAFG00000015737	ANXA11
ENSCAFG00000015946	CCSER2
ENSCAFG00000017264
ENSCAFG00000017264
ENSCAFG00000017348	THG1L
ENSCAFG00000017605	MRPL22
ENSCAFG00000018415	MOCS2
ENSCAFG00000018516	MRPS30
ENSCAFG00000018797	BRIX1
ENSCAFG00000018802	RAD1
ENSCAFG00000018844	ADAMTS12
ENSCAFG00000010132	APLP2
ENSCAFG00000013162	TAGLN
ENSCAFG00000013258	SIK3
ENSCAFG00000013720	ZW10
ENSCAFG00000014668	SLC35F2
ENSCAFG00000015914	PELP1
ENSCAFG00000016104	GABARAP
ENSCAFG00000017008	AURKB
ENSCAFG00000018463	COPS3
ENSCAFG00000018538	SERBP1
ENSCAFG00000018670	PGM1
ENSCAFG00000032423	SCP2
ENSCAFG00000019259	MRPL20
ENSCAFG00000019485	WRAP73
ENSCAFG00000019574	ACOT7
ENSCAFG00000019688	RERE
ENSCAFG00000019909
ENSCAFG00000019922	EMC8
ENSCAFG00000019946	USP10
ENSCAFG00000024504	MPHOSPH6
ENSCAFG00000031455	GABARAPL2
ENSCAFG00000020215	IST1
ENSCAFG00000031831	PSMD7
ENSCAFG00000029835	NIP7
ENSCAFG00000020355	CTCF
ENSCAFG00000014039	TRIP6
ENSCAFG00000014748	MCM7
ENSCAFG00000014814	COPS6
ENSCAFG00000015065
ENSCAFG00000015635
ENSCAFG00000016418	EIF3B
ENSCAFG00000016970	MVP
ENSCAFG00000017059	HIRIP3
ENSCAFG00000017216	TUFM
ENSCAFG00000017710	METTL9
ENSCAFG00000017924	REXO5
ENSCAFG00000018135	COQ7
ENSCAFG00000018865	RSL1D1
ENSCAFG00000019207	HMOX2
ENSCAFG00000019212	DNAJA3
ENSCAFG00000019317	THOC6
ENSCAFG00000019397	RNPS1
ENSCAFG00000031099	STUB1
ENSCAFG00000019680	TMEM8A
ENSCAFG00000013709
ENSCAFG00000019789	RBM15
ENSCAFG00000024650	LRRC8B
ENSCAFG00000020233	LMO4
ENSCAFG00000020311	RPF1
ENSCAFG00000020357	DNAJB4
ENSCAFG00000020417	CTH
ENSCAFG00000020429	DEPDC1
ENSCAFG00000010385	KLHL12
ENSCAFG00000010612	TIMM17A
ENSCAFG00000012136	NEK2
ENSCAFG00000012338	NENF
ENSCAFG00000012352	NSL1
ENSCAFG00000013205	DHX9
ENSCAFG00000013234	LAMC1
ENSCAFG00000013490	FAM129A
ENSCAFG00000013499	RNF2
ENSCAFG00000010149	CCT6A
ENSCAFG00000015311	TIPRL
ENSCAFG00000016416	CAPN2
ENSCAFG00000016788	GPATCH4
ENSCAFG00000016826	CCT3
ENSCAFG00000016941	DAP3
ENSCAFG00000016996	MTX1
ENSCAFG00000017248	UBAP2L
ENSCAFG00000017530	ILF2
ENSCAFG00000017553	S100A6
ENSCAFG00000017854	SLC39A6
ENSCAFG00000018147	SS18
ENSCAFG00000018247	SNRPD1
ENSCAFG00000032168	MYL12B
ENSCAFG00000018851	CEP76
ENSCAFG00000018928	MBD1
ENSCAFG00000010853	FBLN5
ENSCAFG00000010893
ENSCAFG00000010893
ENSCAFG00000011159	OXA1L
ENSCAFG00000011217	RBM23
ENSCAFG00000011243	PRMT5
ENSCAFG00000012049	IPO4
ENSCAFG00000012823	STRN3
ENSCAFG00000013302	BAZ1A
ENSCAFG00000013360	PPP2R3C
ENSCAFG00000015007	MAPK1IP1L
ENSCAFG00000015287	PSMA3
ENSCAFG00000015598	DHRS7
ENSCAFG00000015639	MNAT1
ENSCAFG00000015967	MTHFD1
ENSCAFG00000016386	EIF2S1
ENSCAFG00000032389	ERH
ENSCAFG00000017215	AHSA1
ENSCAFG00000017415	ZC3H14
ENSCAFG00000031111	EFCAB11
ENSCAFG00000017783	PAPOLA
ENSCAFG00000018036	HSP90AA1
ENSCAFG00000018292	ZFYVE21
ENSCAFG00000011453	PSMD12
ENSCAFG00000013869	NMT1
ENSCAFG00000014379	LSM12
ENSCAFG00000014592	NBR1
ENSCAFG00000015912	JUP
ENSCAFG00000016060	RARA
ENSCAFG00000016106	CDC6
ENSCAFG00000016878	CALCOCO2
ENSCAFG00000016946	SLC35B1
ENSCAFG00000017560	RAD51C
ENSCAFG00000017748	BCAS3
ENSCAFG00000018382	PSMD11
ENSCAFG00000018475	TEFM
ENSCAFG00000018507	UTP6
ENSCAFG00000019005	BLMH
ENSCAFG00000002070	FAM32A
ENSCAFG00000019481	SSNA1
ENSCAFG00000019672	PMPCA
ENSCAFG00000020050	GLE1
ENSCAFG00000020166	ANGPTL2
ENSCAFG00000011591	HCCS
ENSCAFG00000011799	GPM6B
ENSCAFG00000028737	GEMIN8
ENSCAFG00000013030	PDHA1
ENSCAFG00000013521	POLA1
ENSCAFG00000014863	RBM10
ENSCAFG00000015003	CDK16
ENSCAFG00000015183	UXT
ENSCAFG00000015339	FTSJ1
ENSCAFG00000016241	SMC1A
ENSCAFG00000017406	CHM
ENSCAFG00000017479	DIAPH2
ENSCAFG00000017633	TIMM8A
ENSCAFG00000017797	TCEAL1
ENSCAFG00000018250	PLS3
ENSCAFG00000018372	PGRMC1
ENSCAFG00000018426	UPF3B
ENSCAFG00000018747	AIFM1
ENSCAFG00000028715	HMGB3
ENSCAFG00000019170
ENSCAFG00000000711	ALG12
ENSCAFG00000000714	ZBED4
ENSCAFG00000001104	RANGAP1
ENSCAFG00000001360	CBX7
ENSCAFG00000029842	MAFF
ENSCAFG00000001456	GCAT
ENSCAFG00000001885	APPL2
ENSCAFG00000002112	TGFBRAP1
ENSCAFG00000000261	RPA3
ENSCAFG00000001209	CDC23
ENSCAFG00000002049	RUSC2
ENSCAFG00000002086	TPM2
ENSCAFG00000002487	GABBR2
ENSCAFG00000003198	FKBP15
ENSCAFG00000000636	VARS
ENSCAFG00000000507	VPS13B
ENSCAFG00000001141	NDRG1
ENSCAFG00000001521	EXOSC4
ENSCAFG00000001798	SLC30A9
ENSCAFG00000002999	ZMPSTE24
ENSCAFG00000003683	ORC6
ENSCAFG00000006529	TMPO
ENSCAFG00000008612	PDGFC
ENSCAFG00000003623	CASP2
ENSCAFG00000003945	DENND2A
ENSCAFG00000006453	PPP2CB
ENSCAFG00000031381	SARAF
ENSCAFG00000007143	ASAH1
ENSCAFG00000003409	RRM2
ENSCAFG00000003435	NOL10
ENSCAFG00000004767	CAD
ENSCAFG00000031985	C9orf16
ENSCAFG00000008956	SPR
ENSCAFG00000008981	EXOC6B
ENSCAFG00000028884	SIKE1
ENSCAFG00000009758	VANGL1
ENSCAFG00000006433	BET1L
ENSCAFG00000007028	NAT10
ENSCAFG00000008299	NUP160
ENSCAFG00000009313	PHF21A
ENSCAFG00000009379	CRY2
ENSCAFG00000010256	NAP1L4
ENSCAFG00000011655	SSH3
ENSCAFG00000013474	FAM89B
ENSCAFG00000013830	CAPN1
ENSCAFG00000014572	FKBP2
ENSCAFG00000015523	WDR74
ENSCAFG00000015540	STX5
ENSCAFG00000015868	ASRGL1
ENSCAFG00000015888	INCENP
ENSCAFG00000016197	TKFC
ENSCAFG00000016326	VPS37C
ENSCAFG00000003716	NAA15
ENSCAFG00000003962	FAT4
ENSCAFG00000000253	PEX7
ENSCAFG00000000390	NUP43
ENSCAFG00000000445	SYNE1
ENSCAFG00000023549	C9orf3
ENSCAFG00000001646	PRUNE2
ENSCAFG00000002293	IPPK
ENSCAFG00000004398	QPCTL
ENSCAFG00000004995	DMAC2
ENSCAFG00000005623	MRPS12
ENSCAFG00000005957	DPF1
ENSCAFG00000006621	WDR62
ENSCAFG00000007590	ZNF507
ENSCAFG00000004406	FBLN2
ENSCAFG00000005344	OGG1
ENSCAFG00000006857	ATXN7
ENSCAFG00000008946	GLT8D1
ENSCAFG00000012919	CDC25A
ENSCAFG00000014512	DDX49
ENSCAFG00000014671	KLHL26
ENSCAFG00000017613	YIPF2
ENSCAFG00000017691	ILF3
ENSCAFG00000004402	PRSS23
ENSCAFG00000005743	INPPL1
ENSCAFG00000006411	SMPD1
ENSCAFG00000005016	DIS3
ENSCAFG00000005040	KLF12
ENSCAFG00000006116	ARHGEF7
ENSCAFG00000005236	TRAK1
ENSCAFG00000007061	PPP2R3A
ENSCAFG00000005651	MKKS
ENSCAFG00000006065	PRNP
ENSCAFG00000006175	CDC25B
ENSCAFG00000006693
ENSCAFG00000006973	SOX12
ENSCAFG00000011596	MOCS3
ENSCAFG00000011788	ZFP64
ENSCAFG00000029331	AURKA
ENSCAFG00000012048	RAE1
ENSCAFG00000006162	SMAD9
ENSCAFG00000007288	CRYL1
ENSCAFG00000007851	HMGB2
ENSCAFG00000007934	CTSB
ENSCAFG00000029087	GATA4
ENSCAFG00000008300	ZNF395
ENSCAFG00000009647	REEP4
ENSCAFG00000012014	SH3BP4
ENSCAFG00000006300	NOC4L
ENSCAFG00000008615	BRAP
ENSCAFG00000011144	UNG
ENSCAFG00000014619	HIRA
ENSCAFG00000015654	PAPSS2
ENSCAFG00000006491	ITGA5
ENSCAFG00000007331	ATG101
ENSCAFG00000008750	PRKAG1
ENSCAFG00000014439	PHB2
ENSCAFG00000014690	MLF2
ENSCAFG00000015642	FOXM1
ENSCAFG00000010696	ADD3
ENSCAFG00000013062	DOCK1
ENSCAFG00000007215	YTHDF3
ENSCAFG00000007673	SULF1
ENSCAFG00000007868	LACTB2
ENSCAFG00000029468	OSGIN2
ENSCAFG00000004754	MCM10
ENSCAFG00000005194	PFKFB3
ENSCAFG00000005354	KLF6
ENSCAFG00000009913	ADCY7
ENSCAFG00000012229	NUDC
ENSCAFG00000012581	CEP85
ENSCAFG00000012914	CLIC4
ENSCAFG00000015189
ENSCAFG00000009165	RPUSD2
ENSCAFG00000009544	NDUFAF1
ENSCAFG00000009632	TYRO3
ENSCAFG00000017616	LARP6
ENSCAFG00000008295	BTG3
ENSCAFG00000028708	SCD5
ENSCAFG00000010906	INTS12
ENSCAFG00000011407	SEC24B
ENSCAFG00000030690	ZBED2
ENSCAFG00000010759	QTRT2
ENSCAFG00000013354	BDH1
ENSCAFG00000012749	GID8
ENSCAFG00000029203	EIF5A2
ENSCAFG00000009756	ELOVL2
ENSCAFG00000014575	TNS1
ENSCAFG00000009462	PRELP
ENSCAFG00000012557	NCSTN
ENSCAFG00000014364	GRPEL1
ENSCAFG00000014453	AFAP1
ENSCAFG00000014808	ADD1
ENSCAFG00000015016	SLBP
ENSCAFG00000015083	MED28
ENSCAFG00000015887	APBB2
ENSCAFG00000016505	DHX15
ENSCAFG00000008467	EDIL3
ENSCAFG00000012452	CCDC6
ENSCAFG00000014002	H2AFY2
ENSCAFG00000032469	DDIT4
ENSCAFG00000016473	NSD1
ENSCAFG00000031644	FBXL7
ENSCAFG00000012342	HMBS
ENSCAFG00000014775	AASDHPPT
ENSCAFG00000015266	MYBBP1A
ENSCAFG00000016129
ENSCAFG00000016651	MPDU1
ENSCAFG00000017886	ELAC2
ENSCAFG00000017899	COX10
ENSCAFG00000030269	MFAP4
ENSCAFG00000018248	PRPSAP2
ENSCAFG00000018994	DHCR24
ENSCAFG00000019077	YIPF1
ENSCAFG00000019387	SKI
ENSCAFG00000019477	MEGF6
ENSCAFG00000019492	LRRC47
ENSCAFG00000019502	DFFB
ENSCAFG00000019619	KLHL21
ENSCAFG00000019822	CHMP1A
ENSCAFG00000019901	SLC7A5
ENSCAFG00000020243	ZFHX3
ENSCAFG00000020344	THAP11
ENSCAFG00000010761	TPST1
ENSCAFG00000011962	RFC2
ENSCAFG00000012539	ABHD11
ENSCAFG00000013367	HIP1
ENSCAFG00000029440	ZNF688
ENSCAFG00000019010	PMM2
ENSCAFG00000019703	RHBDF1
ENSCAFG00000020179	TGFBR3
ENSCAFG00000012530	PTPN14
ENSCAFG00000015259	DPT
ENSCAFG00000016244	LBR
ENSCAFG00000016747	MRPL24
ENSCAFG00000016806	MEF2D
ENSCAFG00000016839	SMG5
ENSCAFG00000016954	RUSC1
ENSCAFG00000016980	FAM189B
ENSCAFG00000018697	TWSG1
ENSCAFG00000011631	NGDN
ENSCAFG00000014940	SAMD4A
ENSCAFG00000016948	LTBP2
ENSCAFG00000017377	PTPN21
ENSCAFG00000017802	VRK1
ENSCAFG00000018075	TRAF3
ENSCAFG00000011038	WIPI1
ENSCAFG00000011721	POLG2
ENSCAFG00000012770	FTSJ3
ENSCAFG00000013494	NSF
ENSCAFG00000016267	PSMD3
ENSCAFG00000016678	KPNB1
ENSCAFG00000016880	ATP5G1
ENSCAFG00000017320	UTP18
ENSCAFG00000018492	CRLF3
ENSCAFG00000019301	CLUH
ENSCAFG00000012938	MGAT1
ENSCAFG00000013272	MBTPS2
ENSCAFG00000015545	SUV39H1
ENSCAFG00000017195	SLC16A2
ENSCAFG00000017704	ARMCX3
ENSCAFG00000018384	SLC25A5
ENSCAFG00000019230	ATP2B3
ENSCAFG00000002659	MSH2
ENSCAFG00000003765	SLC41A3
ENSCAFG00000010350	CYB5R1
ENSCAFG00000003400	DDC
ENSCAFG00000010084	CCT5
ENSCAFG00000029227	CSRP1
ENSCAFG00000006918	MAP3K12
ENSCAFG00000029134	MYL12A
ENSCAFG00000001400	PUF60
ENSCAFG00000001760	LSM3
ENSCAFG00000015552	NUP88
ENSCAFG00000016653	PHKG2
ENSCAFG00000031420	NOP10
ENSCAFG00000009030	NSUN3
ENSCAFG00000003186	AKIRIN1
ENSCAFG00000028636	IGFBP6
ENSCAFG00000018341	TYMS
ENSCAFG00000032748	UBL3
ENSCAFG00000000125	NARS
ENSCAFG00000014931	PSMC3IP
ENSCAFG00000013864
ENSCAFG00000013540	AIDA
ENSCAFG00000006963	AAAS
ENSCAFG00000006981	C12orf10
ENSCAFG00000007035	MFSD5
ENSCAFG00000019808	TCF25
ENSCAFG00000010045	HMGN1
ENSCAFG00000003169	CALD1
ENSCAFG00000003278	CDCA8
ENSCAFG00000016433	MIIP
ENSCAFG00000001124	PHF20L1
ENSCAFG00000012591	NDUFA10
ENSCAFG00000011037	NCL
ENSCAFG00000028956	SAP30BP
ENSCAFG00000019920	NUP214
ENSCAFG00000002330	IGFBP7
ENSCAFG00000000366	SASH1
ENSCAFG00000017939	ERI2
ENSCAFG00000008016	UQCC1
ENSCAFG00000016855	HOXB7
ENSCAFG00000009390	PPP3CC
ENSCAFG00000015002	PRRX1
ENSCAFG00000009667	NUDT18
ENSCAFG00000010318	DYNLL1
ENSCAFG00000017013	SGCA
ENSCAFG00000001004	WDYHV1
ENSCAFG00000029985	RNF139
ENSCAFG00000005598	FAM168A
ENSCAFG00000015961	UBE2K
ENSCAFG00000000918	MCAT
ENSCAFG00000020201	RABEPK
ENSCAFG00000016790	BNIP1
ENSCAFG00000030620
ENSCAFG00000004752	MRPS7
ENSCAFG00000017365	TMEM100
ENSCAFG00000001003	CENPM
ENSCAFG00000017430	SRSF1
ENSCAFG00000012926	WBP11
ENSCAFG00000010677	EYA2
ENSCAFG00000003487	PQLC3
ENSCAFG00000010706	MXI1
ENSCAFG00000001383
ENSCAFG00000002161	SLC25A13
ENSCAFG00000006339	CACNA2D1
ENSCAFG00000007967	MRPS27
ENSCAFG00000032175	LHFPL2
ENSCAFG00000030804	RNLS
ENSCAFG00000014816	CNOT9
ENSCAFG00000030843	INSIG2
ENSCAFG00000004549	AKR1A1
ENSCAFG00000010184	DEK
ENSCAFG00000012224	HINFP
ENSCAFG00000013017	CYB561
ENSCAFG00000013460	C1orf21
ENSCAFG00000002307	ASPN
ENSCAFG00000014626	TMX1
ENSCAFG00000003949	WDCP
ENSCAFG00000011500	NOL11
ENSCAFG00000012874	PDE6H
ENSCAFG00000018353
ENSCAFG00000009290	RNFT2
ENSCAFG00000009547	PNPLA2
ENSCAFG00000016170	RAB15
ENSCAFG00000012215	AP1S2
ENSCAFG00000023758	CCDC59
ENSCAFG00000010121	CD81
ENSCAFG00000008249	GYG1
ENSCAFG00000032060	RAB11B
ENSCAFG00000018515	43161
ENSCAFG00000015034	NOP2
ENSCAFG00000011317	SELPLG
ENSCAFG00000001995	FANCG
ENSCAFG00000011149	SNRNP40
ENSCAFG00000000425	ARMT1
ENSCAFG00000007553	MRPL35
ENSCAFG00000004009	GRWD1
ENSCAFG00000019409	LSM7
ENSCAFG00000007257	DRAM1
ENSCAFG00000019426	IZUMO4
ENSCAFG00000003501	FAM3C
ENSCAFG00000015221	EMC1
ENSCAFG00000000847	FGFR1OP
ENSCAFG00000030380	POLE3
ENSCAFG00000018398	CDCA4
ENSCAFG00000018440
ENSCAFG00000017071	NONO
ENSCAFG00000011208	RNF115
ENSCAFG00000005730	DOCK9
ENSCAFG00000013597	ST7L
ENSCAFG00000032451	ARPC5L
ENSCAFG00000030617	NXPH3
ENSCAFG00000016145	KLHL5
ENSCAFG00000006835	NR1H4
ENSCAFG00000011914	CSTF1
ENSCAFG00000001796	TMEM33
ENSCAFG00000005617	ARL8B
ENSCAFG00000028574	NXT2
ENSCAFG00000002034	FIP1L1
ENSCAFG00000018033	PTPN9
ENSCAFG00000003772	SNX3

## Sheet: CA_Green_gene(CA2)
Ensemble	Gene_Name
ENSCAFG00000004673	KHK
ENSCAFG00000010871	LRP5
ENSCAFG00000010391	FAM189A1
ENSCAFG00000010991	ACACB
ENSCAFG00000015146	SYN1
ENSCAFG00000015035	KIF17
ENSCAFG00000014847	SYNPO2L
ENSCAFG00000004321	TSPAN1
ENSCAFG00000015722	SNAPC1
ENSCAFG00000031807	ZNF146
ENSCAFG00000015071	ATG9A
ENSCAFG00000031655	PRSS8
ENSCAFG00000001511	IL2RB
ENSCAFG00000004190	ARHGAP35
ENSCAFG00000016020	ACTB
ENSCAFG00000009952	KCNIP2
ENSCAFG00000015196	SCNN1A
ENSCAFG00000009623	REN
ENSCAFG00000000517	TNF
ENSCAFG00000010772	GAL
ENSCAFG00000018023	GP2
ENSCAFG00000006161	ADRB3
ENSCAFG00000015268	TBX19
ENSCAFG00000011496	PIGR
ENSCAFG00000000215	R3HDM2
ENSCAFG00000001813	RFX4
ENSCAFG00000003101	UBE2J1
ENSCAFG00000024968	CPA1
ENSCAFG00000002114	PON1
ENSCAFG00000002467	SNX13
ENSCAFG00000012309	ANXA9
ENSCAFG00000012378	RBM4B
ENSCAFG00000016264	DDB1
ENSCAFG00000000016	MBP
ENSCAFG00000002620	TNNT1
ENSCAFG00000010754	SLC38A3
ENSCAFG00000019728	THEG
ENSCAFG00000006334	GRTP1
ENSCAFG00000008318	ASIC1
ENSCAFG00000015203	PLEKHG6
ENSCAFG00000013368	APOD
ENSCAFG00000031538	INPP1
ENSCAFG00000012886	APOA2
ENSCAFG00000011927	RHCG
ENSCAFG00000016038	LDB3
ENSCAFG00000017351	SOX30
ENSCAFG00000018091	SYNPO
ENSCAFG00000012691	KMT2A
ENSCAFG00000010867
ENSCAFG00000016991	SEZ6L2
ENSCAFG00000017666	DCTN5
ENSCAFG00000019201	MGRN1
ENSCAFG00000017416	DENND4B
ENSCAFG00000016763	RGS6
ENSCAFG00000017077	TTLL5
ENSCAFG00000017178	POMT2
ENSCAFG00000000568	MAPK8IP2
ENSCAFG00000001420	TMEM184B
ENSCAFG00000001424	PLA2G6
ENSCAFG00000001132	HNRNPA0
ENSCAFG00000002770	FKTN
ENSCAFG00000024926	DGAT1
ENSCAFG00000002878
ENSCAFG00000029790	TRIM17
ENSCAFG00000003097	CRHR2
ENSCAFG00000031582	EHF
ENSCAFG00000023780
ENSCAFG00000004392	DMPK
ENSCAFG00000031522	MAP2K7
ENSCAFG00000024936	MTUS2
ENSCAFG00000009685	SEC31B
ENSCAFG00000010777	KHDRBS1
ENSCAFG00000009773	NEDD9
ENSCAFG00000014686	VIL1
ENSCAFG00000009102	BHMT2
ENSCAFG00000016968	FOXI1
ENSCAFG00000009907	NTM
ENSCAFG00000020362	HSD11B2
ENSCAFG00000020397	CDH16
ENSCAFG00000018791	BFAR
ENSCAFG00000018931	CIITA
ENSCAFG00000010497	PPP1R12B
ENSCAFG00000016120	SPTB
ENSCAFG00000018408	BRF1
ENSCAFG00000016884	UBE2Z
ENSCAFG00000017845	DHRS11
ENSCAFG00000015068	ITIH3
ENSCAFG00000004633	RHO
ENSCAFG00000012249	ADCY1
ENSCAFG00000011158	CFAP46
ENSCAFG00000001816	ATP8A1
ENSCAFG00000017480	AQP8
ENSCAFG00000030630
ENSCAFG00000004592	TESK2
ENSCAFG00000009576	ERLIN1
ENSCAFG00000020156	RALGPS1
ENSCAFG00000004677	AKAP11
ENSCAFG00000011538	SCN3B
ENSCAFG00000003681	DKKL1
ENSCAFG00000012319	UPK2
ENSCAFG00000012146	SCN4A
ENSCAFG00000001567	SH3GL2
ENSCAFG00000007041	MAG
ENSCAFG00000002357	PAX5
ENSCAFG00000003971	FAM83E

## Sheet: CA_Red_gene(CA3)
Ensemble	Gene_Name
ENSCAFG00000032145	BLCAP
ENSCAFG00000028591	POPDC3
ENSCAFG00000010798	TNNT2
ENSCAFG00000008524	MYL2
ENSCAFG00000013694	ADIPOQ
ENSCAFG00000000450	TSPAN8
ENSCAFG00000001923	DNAI1
ENSCAFG00000007134	MYBPC1
ENSCAFG00000002877	PGAM2
ENSCAFG00000007596	SLC25A4
ENSCAFG00000008497	GPM6A
ENSCAFG00000010081	TNNT3
ENSCAFG00000002982	MYBPC2
ENSCAFG00000004507	CKM
ENSCAFG00000009404	TNNC1
ENSCAFG00000013618	MYL3
ENSCAFG00000004753	ARPP21
ENSCAFG00000007247	ANKRD1
ENSCAFG00000011103	NRAP
ENSCAFG00000005169	PRKCQ
ENSCAFG00000010824	ZNF106
ENSCAFG00000008589	ART3
ENSCAFG00000012432	MYOZ2
ENSCAFG00000011446	USP13
ENSCAFG00000030318	HRASLS
ENSCAFG00000009977	CAP2
ENSCAFG00000012305	KLHL41
ENSCAFG00000013140	MAP3K20
ENSCAFG00000013875	MYL1
ENSCAFG00000013196	TM6SF1
ENSCAFG00000010822	ACTN2
ENSCAFG00000031936	NRBF2
ENSCAFG00000014842	MYOZ1
ENSCAFG00000014074	CRYAB
ENSCAFG00000015802	ENO3
ENSCAFG00000016543	MYLPF
ENSCAFG00000016887	COX6A2
ENSCAFG00000017254	ATP2A1
ENSCAFG00000011770	TEX2
ENSCAFG00000001575	APOBEC2
ENSCAFG00000005737	SFRP1
ENSCAFG00000029034	PDLIM3
ENSCAFG00000005283	CLIP4
ENSCAFG00000004439	RTN2
ENSCAFG00000028609	TNNC2
ENSCAFG00000015655	NRIP2
ENSCAFG00000016243	TUBA8
ENSCAFG00000009466	GOT1
ENSCAFG00000012199	BAG3
ENSCAFG00000017138	CILP
ENSCAFG00000009840	FAM13A
ENSCAFG00000012449	USP53
ENSCAFG00000010884	CACNA1S
ENSCAFG00000012445	PROX1
ENSCAFG00000014924	MYOC
ENSCAFG00000017951	DTNA
ENSCAFG00000005896	RYR1
ENSCAFG00000029801	DUSP26
ENSCAFG00000016374	TCAP
ENSCAFG00000001705	MB
ENSCAFG00000019082	RBFOX1
ENSCAFG00000032403	MAP3K7CL
ENSCAFG00000002023	RCAN2
ENSCAFG00000018088	MYOZ3
ENSCAFG00000008350	PKIA
ENSCAFG00000014281	PYGM

## Sheet: CA_Pink_gene(CA4)
Ensemble	Gene_Name
ENSCAFG00000013599	HRG
ENSCAFG00000014653	G6PC
ENSCAFG00000003016	ALB
ENSCAFG00000009333	CESdD1
ENSCAFG00000012068	AGT
ENSCAFG00000013318	CYP2E1
ENSCAFG00000013322	APOC3
ENSCAFG00000005052	CYP2B6
ENSCAFG00000001089	LECT2
ENSCAFG00000002598	ALDOB
ENSCAFG00000002949	GC
ENSCAFG00000003021	AFM
ENSCAFG00000008424	FGB
ENSCAFG00000023178	FGA
ENSCAFG00000010027	HAO2
ENSCAFG00000006258	F10
ENSCAFG00000005057	ITIH2
ENSCAFG00000013591	FETUB
ENSCAFG00000014889	AZGP1
ENSCAFG00000014470	SERPINC1
ENSCAFG00000018046	TTR
ENSCAFG00000017675	SERPINA3
ENSCAFG00000019537	C8G
ENSCAFG00000014821	RGN
ENSCAFG00000007126	HPN
ENSCAFG00000005890	HAO1
ENSCAFG00000016233	AGMAT
ENSCAFG00000013966	CPS1
ENSCAFG00000031922	GPX3
ENSCAFG00000023610	SERPINA4
ENSCAFG00000007048	HAMP
ENSCAFG00000004499	CPB2
ENSCAFG00000006430	HPX
ENSCAFG00000025075	DEFB1

## Sheet: CA_Black_gene(CA5)
Ensemble	Gene_Name
ENSCAFG00000002612	SMAP1
ENSCAFG00000014116	ATP6AP2
ENSCAFG00000011995	THEMIS2
ENSCAFG00000004373	TYR
ENSCAFG00000031898	ATP6V0E1
ENSCAFG00000000408	IFNG
ENSCAFG00000013073	FUCA1
ENSCAFG00000000337	PPM1H
ENSCAFG00000000525	GLIPR1
ENSCAFG00000001620	ATP6V1F
ENSCAFG00000028917	SNX10
ENSCAFG00000007248	GNPTAB
ENSCAFG00000004623	SLC4A2
ENSCAFG00000003323	KIDINS220
ENSCAFG00000005205	BABAM2
ENSCAFG00000000133	WDR7
ENSCAFG00000010689	SLC39A8
ENSCAFG00000012085	ABCC5
ENSCAFG00000025002	DPP4
ENSCAFG00000011101	GPR137B
ENSCAFG00000030194	CPPED1
ENSCAFG00000019363	ATP6V0C
ENSCAFG00000019565	CLCN7
ENSCAFG00000016369	ATP6V1D
ENSCAFG00000000988	NAGA
ENSCAFG00000000680	OXR1
ENSCAFG00000001833	ABCB4
ENSCAFG00000003373	DGKI
ENSCAFG00000008279	PTPRJ
ENSCAFG00000010972	TCIRG1
ENSCAFG00000000011	NFATC1
ENSCAFG00000008755	SRC
ENSCAFG00000010095	ATP6V1B2
ENSCAFG00000011247	LAPTM5
ENSCAFG00000010769	MANBA
ENSCAFG00000014597	ITGAV
ENSCAFG00000016330	CLN8
ENSCAFG00000018370	MYO1D
ENSCAFG00000009168	ARSB
ENSCAFG00000019582	ATP6AP1
ENSCAFG00000032326	S100A2

## Sheet: CA_Yellow_gene(CA6)
Ensemble	Gene_Name
ENSCAFG00000019907	ZCCHC14
ENSCAFG00000012775	CTBP2
ENSCAFG00000016434	MRM2
ENSCAFG00000012108	PRKAR2A
ENSCAFG00000017588	TMEM251
ENSCAFG00000011894	WDR5B
ENSCAFG00000016540	ARHGEF9
ENSCAFG00000000721	ISOC1
ENSCAFG00000013256	MRC2
ENSCAFG00000016972	MED12
ENSCAFG00000031330	HOPX
ENSCAFG00000011820	PRPF3
ENSCAFG00000005652
ENSCAFG00000000676	DPYS
ENSCAFG00000008938	RAB11FIP5
ENSCAFG00000012961	DCAF7
ENSCAFG00000009794	EDN1
ENSCAFG00000003406	MET
ENSCAFG00000015063	MMP3
ENSCAFG00000002951	SNAP91
ENSCAFG00000013909	SERPINE1
ENSCAFG00000006121	ATP2B1
ENSCAFG00000000738	EBAG9
ENSCAFG00000014853	ALPL
ENSCAFG00000016656	AR
ENSCAFG00000018230	IL13RA2
ENSCAFG00000013751	PDC
ENSCAFG00000000788	PPARA
ENSCAFG00000009427	PTPN13
ENSCAFG00000002941	ME1
ENSCAFG00000013715	DUOX1
ENSCAFG00000018704	SLC1A3
ENSCAFG00000006881	SLC1A2
ENSCAFG00000015043	MMP13
ENSCAFG00000007539	ADM
ENSCAFG00000003996	FGF2
ENSCAFG00000018306	STXBP2
ENSCAFG00000009905	MMP9
ENSCAFG00000006889	CD44
ENSCAFG00000016882	SSR2
ENSCAFG00000031460	ICAM1
ENSCAFG00000014200	IL12A
ENSCAFG00000003404	CAV1
ENSCAFG00000010955	PTHLH
ENSCAFG00000009795	ATP1A1
ENSCAFG00000018661	LIFR
ENSCAFG00000000122	APOF
ENSCAFG00000002105	FHL2
ENSCAFG00000002130	SLC9A2
ENSCAFG00000000433	GFPT2
ENSCAFG00000001715	MOB3B
ENSCAFG00000002847	EPB41L4B
ENSCAFG00000002143	DYNC1I1
ENSCAFG00000002801	NPY
ENSCAFG00000003023	CHN2
ENSCAFG00000003402	CAV2
ENSCAFG00000003481	ING3
ENSCAFG00000005419	PNP
ENSCAFG00000008861	CPE
ENSCAFG00000025529	TPK1
ENSCAFG00000005886	CRIM1
ENSCAFG00000009067	ZNF638
ENSCAFG00000011357	PEX11B
ENSCAFG00000003476	BLVRA
ENSCAFG00000004057	SRPK2
ENSCAFG00000006381	SEMA3C
ENSCAFG00000008656	MADD
ENSCAFG00000010271	CARS
ENSCAFG00000013153	FIBP
ENSCAFG00000015963	FADS3
ENSCAFG00000005507	ACVR2A
ENSCAFG00000005610	KIF5C
ENSCAFG00000000419	AKAP12
ENSCAFG00000000760	MAP3K4
ENSCAFG00000002180	SEMA4D
ENSCAFG00000003604	RRAS
ENSCAFG00000004666	PVR
ENSCAFG00000006960	TMEM147
ENSCAFG00000004148	RPN1
ENSCAFG00000006548	UBA3
ENSCAFG00000006612	SUCLG2
ENSCAFG00000008647	TKT
ENSCAFG00000011207	DAG1
ENSCAFG00000031251	DDA1
ENSCAFG00000029464	CDC34
ENSCAFG00000007845	DKK3
ENSCAFG00000008396	RRAS2
ENSCAFG00000005458	CLDN10
ENSCAFG00000006082	CARS2
ENSCAFG00000005727	RARB
ENSCAFG00000007170	PCCB
ENSCAFG00000005587	ESF1
ENSCAFG00000007588	NCOA6
ENSCAFG00000008085	ERGIC3
ENSCAFG00000010313	ELMO2
ENSCAFG00000011531	PTPN1
ENSCAFG00000006098	SUPT20H
ENSCAFG00000006294	STARD13
ENSCAFG00000006694	STX2
ENSCAFG00000030033	ERP29
ENSCAFG00000008894	PTPN11
ENSCAFG00000009069	TMEM106C
ENSCAFG00000010022	ABCD2
ENSCAFG00000025202	CA2
ENSCAFG00000004130	NEBL
ENSCAFG00000005468	PFKP
ENSCAFG00000006917	MAP3K1
ENSCAFG00000007950	MAP1B
ENSCAFG00000023246	PLA2G5
ENSCAFG00000010215	UNC5C
ENSCAFG00000011252	LEF1
ENSCAFG00000012281	KALRN
ENSCAFG00000010102	SEMA5A
ENSCAFG00000014582	SERPINI1
ENSCAFG00000009885	JARID2
ENSCAFG00000009380	OSGEPL1
ENSCAFG00000015113	QDPR
ENSCAFG00000008302	MEF2C
ENSCAFG00000015340	ADK
ENSCAFG00000017181	MAT2B
ENSCAFG00000017484	CYFIP2
ENSCAFG00000018546	NNT
ENSCAFG00000013143	PCSK7
ENSCAFG00000032342	PDGFD
ENSCAFG00000017913	PMP22
ENSCAFG00000019264	CCNL2
ENSCAFG00000019381	PRKCZ
ENSCAFG00000019797	UBE4B
ENSCAFG00000019785	KIF1B
ENSCAFG00000011514	GTF2I
ENSCAFG00000013010	TBL2
ENSCAFG00000016838	KAT8
ENSCAFG00000019809	GSTM3
ENSCAFG00000020147	MTF2
ENSCAFG00000020209	GTF2B
ENSCAFG00000020276	CYR61
ENSCAFG00000020321	TTLL7
ENSCAFG00000012107	RCOR3
ENSCAFG00000013778	PLA2G4A
ENSCAFG00000013935	FAM20B
ENSCAFG00000017062	SLC50A1
ENSCAFG00000018575	EPB41L3
ENSCAFG00000011284	C14orf93
ENSCAFG00000023936	ARID4A
ENSCAFG00000016702	PCNX1
ENSCAFG00000010758	MAP2K6
ENSCAFG00000010810	ABCA5
ENSCAFG00000013325	PHEX
ENSCAFG00000014469	EFHC2
ENSCAFG00000018218	AMOT
ENSCAFG00000018830	RAP2C
ENSCAFG00000000135	BAZ2A
ENSCAFG00000000364	WIF1
ENSCAFG00000000850	KIAA0930
ENSCAFG00000001630	MYH9
ENSCAFG00000001805	RIC8B
ENSCAFG00000002260	REV1
ENSCAFG00000002955	BCL11A
ENSCAFG00000001460	PTPRD
ENSCAFG00000000406	PPP1R10
ENSCAFG00000031894	FAM46A
ENSCAFG00000000865	ENPP2
ENSCAFG00000001050	MTSS1
ENSCAFG00000001585	FLNC
ENSCAFG00000002816	MPP6
ENSCAFG00000032285	HOXA3
ENSCAFG00000003606	GJB3
ENSCAFG00000005766	SYT1
ENSCAFG00000029647
ENSCAFG00000007825	TRAPPC11
ENSCAFG00000006510	EML4
ENSCAFG00000007809	RETSAT
ENSCAFG00000009005	CYP26B1
ENSCAFG00000011046	BCL9
ENSCAFG00000003470	LANCL2
ENSCAFG00000003480	STK17A
ENSCAFG00000004556	GPRC5C
ENSCAFG00000005078	UBE2O
ENSCAFG00000008977	LRP4
ENSCAFG00000009400	TP53I11
ENSCAFG00000011629	CLCF1
ENSCAFG00000004165	NDNF
ENSCAFG00000000691	IGF2R
ENSCAFG00000004058	CABP5
ENSCAFG00000006801	HSPB6
ENSCAFG00000014181	LPAR2
ENSCAFG00000004731	TENM4
ENSCAFG00000006757	PPFIBP2
ENSCAFG00000005411	OSBPL10
ENSCAFG00000005544	KIF16B
ENSCAFG00000009082	PLCG1
ENSCAFG00000012518	LSM14B
ENSCAFG00000006816	USP12
ENSCAFG00000007161	SGCG
ENSCAFG00000008969	KCTD9
ENSCAFG00000009187	LOXL2
ENSCAFG00000011352	SART3
ENSCAFG00000031033	EMP1
ENSCAFG00000030126	CRH
ENSCAFG00000006607	DPYSL3
ENSCAFG00000008704	THBS1
ENSCAFG00000017779	NEO1
ENSCAFG00000017808	NPTN
ENSCAFG00000008305	C21orf91
ENSCAFG00000008892	URB1
ENSCAFG00000010267	RAP1GDS1
ENSCAFG00000008741	EPHA3
ENSCAFG00000010491	LPCAT1
ENSCAFG00000013218	EHHADH
ENSCAFG00000014851	CLDN11
ENSCAFG00000013096	RAPGEF4
ENSCAFG00000013740	MAP2
ENSCAFG00000009253	PDE8B
ENSCAFG00000018356	FBXO38
ENSCAFG00000019081	MYO10
ENSCAFG00000012380	SLC37A4
ENSCAFG00000013467	POR
ENSCAFG00000015760	C7orf26
ENSCAFG00000030242	HS3ST2
ENSCAFG00000019134	PPL
ENSCAFG00000020080	PTBP2
ENSCAFG00000011756	PLXNA2
ENSCAFG00000016039	PSEN2
ENSCAFG00000016089	PARP1
ENSCAFG00000014603	TRIM9
ENSCAFG00000017048	FLVCR2
ENSCAFG00000017144	VASH1
ENSCAFG00000018142	DUSP14
ENSCAFG00000018117	CHRDL1
ENSCAFG00000018537	CUL4B
ENSCAFG00000018826	STK26
ENSCAFG00000018857	GPC4
ENSCAFG00000018331	COLEC12
ENSCAFG00000005733	GOLGA7
ENSCAFG00000031110	COA1
ENSCAFG00000015397	YPEL1
ENSCAFG00000023333	C5orf30
ENSCAFG00000010049	GFRA2
ENSCAFG00000016947	FAM117A
ENSCAFG00000017064	CHAD
ENSCAFG00000020227	DENND1A
ENSCAFG00000010816	PTP4A2
ENSCAFG00000013859	GEMIN2
ENSCAFG00000010101	KIF13A
ENSCAFG00000018655	TMEM97
ENSCAFG00000015745	EVC
ENSCAFG00000017894	YY1
ENSCAFG00000024171
ENSCAFG00000015918	RAB3IL1
ENSCAFG00000000828	RPS6KA2
ENSCAFG00000018438	CRIP2
ENSCAFG00000008498	MEIS2
ENSCAFG00000005539	PPME1
ENSCAFG00000001562	BNC2

## Sheet: CA_Blue_gene(CA7)
Ensemble	Gene_Name
ENSCAFG00000000916	GDF9
ENSCAFG00000005043	EXOC7
ENSCAFG00000011516	TOMM20
ENSCAFG00000005632	KAT6A
ENSCAFG00000007510	ELP4
ENSCAFG00000018547	C1GALT1C1
ENSCAFG00000000007	ADNP2
ENSCAFG00000002372	ZNF135
ENSCAFG00000007405	CEBPG
ENSCAFG00000014236	FDX1
ENSCAFG00000023380	DTX3
ENSCAFG00000007219	ASXL1
ENSCAFG00000016361
ENSCAFG00000000442	MDC1
ENSCAFG00000003083	CCT4
ENSCAFG00000017104	GDPD3
ENSCAFG00000017855	SPARC
ENSCAFG00000017426	VEZF1
ENSCAFG00000005966	TEX30
ENSCAFG00000017153	CITED1
ENSCAFG00000019887	GTF3C4
ENSCAFG00000016130	ILVBL
ENSCAFG00000029015
ENSCAFG00000015050
ENSCAFG00000017220	LUC7L3
ENSCAFG00000005970	FGFR1
ENSCAFG00000009587	BMP1
ENSCAFG00000009106
ENSCAFG00000032081	GTF2H4
ENSCAFG00000029596	GNA12
ENSCAFG00000012086	CTSS
ENSCAFG00000008557	APP
ENSCAFG00000014629	HGFAC
ENSCAFG00000014435	MAOA
ENSCAFG00000016889	ARHGEF2
ENSCAFG00000002579	EDN2
ENSCAFG00000014655	GNB3
ENSCAFG00000005564	UCP2
ENSCAFG00000003065	SLC35A1
ENSCAFG00000017018	COL1A1
ENSCAFG00000002067	SLC1A1
ENSCAFG00000010210	ACTR1A
ENSCAFG00000014701	PTGER2
ENSCAFG00000015155	TIMP1
ENSCAFG00000002069	COL1A2
ENSCAFG00000009059	COL2A1
ENSCAFG00000010193	GUSB
ENSCAFG00000003029	CXCL8
ENSCAFG00000017122	SULT1A1
ENSCAFG00000017122	SULT1A1
ENSCAFG00000019189	BGN
ENSCAFG00000013878	PNN
ENSCAFG00000012013	ANPEP
ENSCAFG00000000140	TCF4
ENSCAFG00000004157	RAB7A
ENSCAFG00000015021	USP11
ENSCAFG00000008363	P2RX4
ENSCAFG00000016083	AKAP8
ENSCAFG00000000238	KIF5A
ENSCAFG00000000259	OS9
ENSCAFG00000000959	POLDIP3
ENSCAFG00000001049	PMM1
ENSCAFG00000001125	EP300
ENSCAFG00000001395	DDX17
ENSCAFG00000001402	KDELR3
ENSCAFG00000023063	APOL5
ENSCAFG00000002729	PSME4
ENSCAFG00000003007	USP34
ENSCAFG00000003175	AFTPH
ENSCAFG00000003329	C2orf42
ENSCAFG00000000240	NHP2
ENSCAFG00000000948	HSPA4
ENSCAFG00000001186	BRD8
ENSCAFG00000001293	HSPA9
ENSCAFG00000002233	NPR2
ENSCAFG00000002377	POLR1E
ENSCAFG00000000386	ARG1
ENSCAFG00000000444	FLOT1
ENSCAFG00000000598	APOM
ENSCAFG00000000617	DDAH2
ENSCAFG00000000639	HSPA1L
ENSCAFG00000000669	EHMT2
ENSCAFG00000000871	BRD2
ENSCAFG00000000941	VPS52
ENSCAFG00000001008	CUTA
ENSCAFG00000001697	UBR2
ENSCAFG00000002002	SUPT3H
ENSCAFG00000002898	DOPEY1
ENSCAFG00000031761	NDUFAF4
ENSCAFG00000003471	PNISR
ENSCAFG00000004043	LAMA4
ENSCAFG00000002094	TMEM165
ENSCAFG00000002140	CLOCK
ENSCAFG00000025112
ENSCAFG00000001819	DMTF1
ENSCAFG00000001977	PEX1
ENSCAFG00000003120	MACF1
ENSCAFG00000003734	ZCCHC11
ENSCAFG00000006353	METAP2
ENSCAFG00000006719	ACTR6
ENSCAFG00000007442	TDG
ENSCAFG00000007566	ANAPC10
ENSCAFG00000007597	ABCE1
ENSCAFG00000008141	FBXW7
ENSCAFG00000004964	XRCC2
ENSCAFG00000006057	NSD3
ENSCAFG00000006478
ENSCAFG00000006632	TNKS
ENSCAFG00000004019	ITSN2
ENSCAFG00000006426	MAP4K3
ENSCAFG00000007450	RMND5A
ENSCAFG00000007522	KDM3A
ENSCAFG00000007720	GGCX
ENSCAFG00000007755	MAT2A
ENSCAFG00000008457	PCGF1
ENSCAFG00000009851	TRIM45
ENSCAFG00000010883	FMO5
ENSCAFG00000011405	TXNIP
ENSCAFG00000004024	RINT1
ENSCAFG00000004204	PSMC2
ENSCAFG00000004510	CDC42EP4
ENSCAFG00000006059	CSNK1D
ENSCAFG00000007368	EIF3M
ENSCAFG00000007847	TIMM10
ENSCAFG00000008452	CELF1
ENSCAFG00000012706	MRPL11
ENSCAFG00000013195	EFEMP2
ENSCAFG00000015064	RTN3
ENSCAFG00000004139	EXOSC9
ENSCAFG00000005031	CCNT2
ENSCAFG00000000103	ZNF532
ENSCAFG00000000282	HECA
ENSCAFG00000000312	PHACTR2
ENSCAFG00000002013	SMARCA2
ENSCAFG00000002208	SPIN1
ENSCAFG00000003625	FCGRT
ENSCAFG00000007340
ENSCAFG00000008269	IL17RB
ENSCAFG00000010866	RBM5
ENSCAFG00000017784	KEAP1
ENSCAFG00000029906	HIKESHI
ENSCAFG00000004486	PICALM
ENSCAFG00000004897	RSF1
ENSCAFG00000005263	EMSY
ENSCAFG00000007416	WEE1
ENSCAFG00000011662	PRPS2
ENSCAFG00000004478	LRCH1
ENSCAFG00000031900	RNF219
ENSCAFG00000005242	RBM26
ENSCAFG00000006458	RASA3
ENSCAFG00000004400	NINL
ENSCAFG00000004783	MLH1
ENSCAFG00000004806	GOLGA4
ENSCAFG00000004820	ITGA9
ENSCAFG00000005066	WDR48
ENSCAFG00000005095	SLC25A38
ENSCAFG00000005702	TOP2B
ENSCAFG00000005774	UBE2E1
ENSCAFG00000005929	BTD
ENSCAFG00000009006	GFM1
ENSCAFG00000005405	SEC23B
ENSCAFG00000031497	BMP2
ENSCAFG00000008327	RBM39
ENSCAFG00000008435	AAR2
ENSCAFG00000008491	DLGAP4
ENSCAFG00000009471	SERINC3
ENSCAFG00000011347	STAU1
ENSCAFG00000006178	SPART
ENSCAFG00000006376
ENSCAFG00000006901	RNF6
ENSCAFG00000007067	NUP58
ENSCAFG00000007222	XPO4
ENSCAFG00000007520	CBR4
ENSCAFG00000007669	CLCN3
ENSCAFG00000008314	ELP3
ENSCAFG00000006625	SFSWAP
ENSCAFG00000007965	MLXIP
ENSCAFG00000008830	TRAFD1
ENSCAFG00000009257	MED13L
ENSCAFG00000010311
ENSCAFG00000010725	GIT2
ENSCAFG00000032601	DRG1
ENSCAFG00000013268	DEPDC5
ENSCAFG00000007831	TFCP2
ENSCAFG00000009223	RPAP3
ENSCAFG00000009286	SLC38A1
ENSCAFG00000009304	SCAF11
ENSCAFG00000010685	SINHCAF
ENSCAFG00000014771
ENSCAFG00000014929	CHD4
ENSCAFG00000015804	WNK1
ENSCAFG00000031801	RPP30
ENSCAFG00000009515	COX15
ENSCAFG00000009588	CHUK
ENSCAFG00000009930	MGEA5
ENSCAFG00000010593	GSTO1
ENSCAFG00000010928	ACSL5
ENSCAFG00000012547	PLEKHA1
ENSCAFG00000007260
ENSCAFG00000007411	CSPP1
ENSCAFG00000008152	ELOC
ENSCAFG00000009482	CPQ
ENSCAFG00000003737	PARD3
ENSCAFG00000004006	SVIL
ENSCAFG00000005905	HARS2
ENSCAFG00000007352	ADAMTS6
ENSCAFG00000007463	TRAPPC13
ENSCAFG00000008514	CSNK2A2
ENSCAFG00000009699	CHD9
ENSCAFG00000011669	SRSF4
ENSCAFG00000012726	PAFAH2
ENSCAFG00000012882	TMEM50A
ENSCAFG00000014825	USP48
ENSCAFG00000014975	EIF4G3
ENSCAFG00000015005	HP1BP3
ENSCAFG00000015314	UBR4
ENSCAFG00000016397	VPS13D
ENSCAFG00000008219	SCG5
ENSCAFG00000009662	MGA
ENSCAFG00000015145	USP8
ENSCAFG00000015318	AP4E1
ENSCAFG00000008371	G3BP2
ENSCAFG00000008685	CCNG2
ENSCAFG00000008974	ENOPH1
ENSCAFG00000009867	BBX
ENSCAFG00000011254	HGD
ENSCAFG00000010118	MTRR
ENSCAFG00000014599	GOLIM4
ENSCAFG00000025512	SERPINB6
ENSCAFG00000009846	NOL7
ENSCAFG00000010417	C6orf62
ENSCAFG00000009963	PSMD14
ENSCAFG00000013416	MTX2
ENSCAFG00000014494	ZC3H15
ENSCAFG00000010080	MYO1B
ENSCAFG00000011878	BZW1
ENSCAFG00000012060	ORC2
ENSCAFG00000013684	PIKFYVE
ENSCAFG00000013836	KANSL1L
ENSCAFG00000010549	GLRX2
ENSCAFG00000010573	UCHL5
ENSCAFG00000013422	ALDH9A1
ENSCAFG00000009743	NIPA2
ENSCAFG00000009863	HERC2
ENSCAFG00000010336	MTMR10
ENSCAFG00000010347	FAN1
ENSCAFG00000010998	CHD2
ENSCAFG00000011583	ABHD2
ENSCAFG00000014076	CTSH
ENSCAFG00000007425	PJA2
ENSCAFG00000007745	RIOK2
ENSCAFG00000009517	HMGCR
ENSCAFG00000010464	MTR
ENSCAFG00000010961	LGALS8
ENSCAFG00000013619	HNRNPH3
ENSCAFG00000013827	VPS26A
ENSCAFG00000014033	PPA1
ENSCAFG00000014388	PSAP
ENSCAFG00000014489	MICU1
ENSCAFG00000015357	KAT6B
ENSCAFG00000015398	VDAC2
ENSCAFG00000016293	FAM193B
ENSCAFG00000016694	NOP16
ENSCAFG00000018684	NUP155
ENSCAFG00000018858	TARS
ENSCAFG00000012572	ARCN1
ENSCAFG00000014183	PPP2R1B
ENSCAFG00000015836	SLC25A11
ENSCAFG00000016117	ELP5
ENSCAFG00000017015	CTC1
ENSCAFG00000018357	DRG2
ENSCAFG00000019064	TMEM59
ENSCAFG00000020132	AARS
ENSCAFG00000010332
ENSCAFG00000010783	TMEM248
ENSCAFG00000011229	AUTS2
ENSCAFG00000015990	RNF216
ENSCAFG00000016799	VKORC1
ENSCAFG00000017139	CLN3
ENSCAFG00000017356	XPO6
ENSCAFG00000018732	MARF1
ENSCAFG00000018856	GSPT1
ENSCAFG00000018993	USP7
ENSCAFG00000019251	CREBBP
ENSCAFG00000019274	CLUAP1
ENSCAFG00000023869	ZNF205
ENSCAFG00000019351	ELOB
ENSCAFG00000019438	TSC2
ENSCAFG00000019647	RHOT2
ENSCAFG00000020135	FNBP1L
ENSCAFG00000010452	KDM5B
ENSCAFG00000010649	IPO9
ENSCAFG00000013717	TPR
ENSCAFG00000014949	PRRC2C
ENSCAFG00000015126	SCYL3
ENSCAFG00000015982	CDC42BPA
ENSCAFG00000016160	EPHX1
ENSCAFG00000016911	RIT1
ENSCAFG00000017162	PBXIP1
ENSCAFG00000017879	GALNT1
ENSCAFG00000018478	MYOM1
ENSCAFG00000018639	PTPRM
ENSCAFG00000018892	CXXC1
ENSCAFG00000010880	TRIP11
ENSCAFG00000010995	LGMN
ENSCAFG00000011427	ACIN1
ENSCAFG00000014041	PRPF39
ENSCAFG00000015592	PCNX4
ENSCAFG00000016428	ARG2
ENSCAFG00000016442	RDH11
ENSCAFG00000016534	ACTN1
ENSCAFG00000025238	ENTPD5
ENSCAFG00000017222	SPTLC2
ENSCAFG00000017315	SEL1L
ENSCAFG00000017986	DYNC1H1
ENSCAFG00000018188	TNFAIP2
ENSCAFG00000014716	PSME3
ENSCAFG00000014827	EZH1
ENSCAFG00000016942	SPOP
ENSCAFG00000017703	MED13
ENSCAFG00000018155	HEATR6
ENSCAFG00000023226	CCL16
ENSCAFG00000018592	NF1
ENSCAFG00000018629	WSB1
ENSCAFG00000018659	IFT20
ENSCAFG00000019221	PRPF8
ENSCAFG00000019882	TSC1
ENSCAFG00000019897	SETX
ENSCAFG00000019963	FNBP1
ENSCAFG00000019975	USP20
ENSCAFG00000020172	MVB12B
ENSCAFG00000015191	TCEA2
ENSCAFG00000011273	SUN1
ENSCAFG00000011781	GPER1
ENSCAFG00000012925	PHKA2
ENSCAFG00000014358	CASK
ENSCAFG00000015620	HDAC6
ENSCAFG00000016064	MAGED1
ENSCAFG00000017134	OGT
ENSCAFG00000017976	PRPS1
ENSCAFG00000018777	ENOX2
ENSCAFG00000023294	HTATSF1
ENSCAFG00000019598	G6PD
ENSCAFG00000030801	IKZF4
ENSCAFG00000000446	PTPRB
ENSCAFG00000000718	BRD1
ENSCAFG00000001701	RBFOX2
ENSCAFG00000001732	HMGXB4
ENSCAFG00000000464	CNOT6
ENSCAFG00000000522	SNCAIP
ENSCAFG00000031961	PPIC
ENSCAFG00000000594	43162
ENSCAFG00000031992	SAR1B
ENSCAFG00000024981	TMEM38B
ENSCAFG00000000679	SKIV2L
ENSCAFG00000000903	COL11A2
ENSCAFG00000000912	RXRB
ENSCAFG00000000963	RGL2
ENSCAFG00000000998	PHF1
ENSCAFG00000001411	STK38
ENSCAFG00000001834	CUL9
ENSCAFG00000002255	ICK
ENSCAFG00000003793	SESN1
ENSCAFG00000001745	CHRNA5
ENSCAFG00000003322	IFRD1
ENSCAFG00000004212	EFCAB14
ENSCAFG00000005220	SZT2
ENSCAFG00000004442	ZNF282
ENSCAFG00000005240	WDR60
ENSCAFG00000005472	SLC20A2
ENSCAFG00000006371	NRG1
ENSCAFG00000012044	ADAMTSL4
ENSCAFG00000023501	SETDB1
ENSCAFG00000012661	RFX5
ENSCAFG00000005589	GAA
ENSCAFG00000010920	KMT5B
ENSCAFG00000011792	KDM2A
ENSCAFG00000013654	DPF2
ENSCAFG00000015594	NXF1
ENSCAFG00000016456	CCDC86
ENSCAFG00000004844	RALB
ENSCAFG00000000373	TAB2
ENSCAFG00000001136	EPB41L2
ENSCAFG00000031861	MZF1
ENSCAFG00000003462	TBC1D17
ENSCAFG00000003981	SULT2B1
ENSCAFG00000004170	DHX34
ENSCAFG00000004824	MEGF8
ENSCAFG00000004396	HDAC11
ENSCAFG00000004535	NR2C2
ENSCAFG00000013997	SACM1L
ENSCAFG00000014291	MAU2
ENSCAFG00000014404	ARMC6
ENSCAFG00000016521	PODNL1
ENSCAFG00000005455	NEU3
ENSCAFG00000005889	RHOG
ENSCAFG00000009161	HPS5
ENSCAFG00000004778	NAA16
ENSCAFG00000006240	MCF2L
ENSCAFG00000004648	CRTAP
ENSCAFG00000006024	SH3BP5
ENSCAFG00000006089	SMOX
ENSCAFG00000009101	ZHX3
ENSCAFG00000032130	TUBB1
ENSCAFG00000013261	PCMTD2
ENSCAFG00000008237	HMBOX1
ENSCAFG00000009703	FAM160B2
ENSCAFG00000028707	ITM2C
ENSCAFG00000006377	EP400
ENSCAFG00000009146	RBM19
ENSCAFG00000012827	TCN2
ENSCAFG00000013163	EIF4ENIF1
ENSCAFG00000006950	SP1
ENSCAFG00000013106	ATF7IP
ENSCAFG00000015047	IFFO1
ENSCAFG00000029387	TIGAR
ENSCAFG00000007775	NCOA2
ENSCAFG00000006250	SPRY4
ENSCAFG00000007560	SREK1
ENSCAFG00000007626	PIK3R1
ENSCAFG00000008461	SETD6
ENSCAFG00000009169	AMFR
ENSCAFG00000010567	BSDC1
ENSCAFG00000012104	WASF2
ENSCAFG00000012314	ARID1A
ENSCAFG00000014644	ZBTB40
ENSCAFG00000010031	VPS39
ENSCAFG00000017011	HERC1
ENSCAFG00000017107
ENSCAFG00000017645	MYO9A
ENSCAFG00000017935	EDC3
ENSCAFG00000008475	MRPL39
ENSCAFG00000009912	ERG
ENSCAFG00000009247	WDFY3
ENSCAFG00000010317	METAP1
ENSCAFG00000011549	ELOVL6
ENSCAFG00000009599	ZBTB11
ENSCAFG00000009793	CBLB
ENSCAFG00000014224	IKZF2
ENSCAFG00000012259	MAN2A2
ENSCAFG00000007396	SLC25A46
ENSCAFG00000007519	PPIP5K2
ENSCAFG00000011196	NID1
ENSCAFG00000012932	RHOBTB1
ENSCAFG00000013316	SIRT1
ENSCAFG00000016856	STK10
ENSCAFG00000017626	FAXDC2
ENSCAFG00000018695	NIPBL
ENSCAFG00000009810	JAM3
ENSCAFG00000014332	EXPH5
ENSCAFG00000019878	MVD
ENSCAFG00000020254	NFAT5
ENSCAFG00000014322	PCOLCE
ENSCAFG00000015036	CPSF4
ENSCAFG00000017492	ARHGAP17
ENSCAFG00000019630	RHBDL1
ENSCAFG00000011474	FCMR
ENSCAFG00000012413	RPS6KC1
ENSCAFG00000012838
ENSCAFG00000016055	ITPKB
ENSCAFG00000016381	DEGS1
ENSCAFG00000017156	SHC1
ENSCAFG00000017725	PIK3C3
ENSCAFG00000014843	FERMT2
ENSCAFG00000015204	TMEM260
ENSCAFG00000015237	EXOC5
ENSCAFG00000016589	SRSF5
ENSCAFG00000016923	ABCD4
ENSCAFG00000017028	NEK9
ENSCAFG00000011108	GNA13
ENSCAFG00000011422	HELZ
ENSCAFG00000015509	STAT5B
ENSCAFG00000016574	PIP4K2B
ENSCAFG00000017036	LRRC59
ENSCAFG00000017314	MBTD1
ENSCAFG00000019390	EHMT1
ENSCAFG00000019838	RXRA
ENSCAFG00000019927	LAMC3
ENSCAFG00000020082	DNM1
ENSCAFG00000016486	MAGEH1
ENSCAFG00000016559	ZC4H2
ENSCAFG00000016607	MSN
ENSCAFG00000029920	TSC22D3
ENSCAFG00000019161	GABRA3
ENSCAFG00000005301	PSD3
ENSCAFG00000006953	PDGFRL
ENSCAFG00000006726
ENSCAFG00000032632	WNT7A
ENSCAFG00000016307	EFHD2
ENSCAFG00000011146	ABHD4
ENSCAFG00000004393	TMEM135
ENSCAFG00000001312	CHCHD3
ENSCAFG00000018442	LPIN2
ENSCAFG00000001610	VPS28
ENSCAFG00000006384
ENSCAFG00000006384
ENSCAFG00000028765
ENSCAFG00000028765
ENSCAFG00000028765
ENSCAFG00000028765
ENSCAFG00000028765
ENSCAFG00000009487	ENTPD7
ENSCAFG00000019615	ZBTB48
ENSCAFG00000008143	MSRA
ENSCAFG00000003179	TMEM140
ENSCAFG00000014373	TXNRD2
ENSCAFG00000004186
ENSCAFG00000012329	UQCRC1
ENSCAFG00000018727	RAB31
ENSCAFG00000001441	MTCH1
ENSCAFG00000015907	SZRD1
ENSCAFG00000010927	BPNT1
ENSCAFG00000012331	BICC1
ENSCAFG00000029303
ENSCAFG00000001282	ETF1
ENSCAFG00000029577	RGS12
ENSCAFG00000012093	CTSK
ENSCAFG00000009217	CHMP7
ENSCAFG00000012477	ITGB5
ENSCAFG00000008937	KANSL2
ENSCAFG00000016668	ANAPC13
ENSCAFG00000006783	TMEM127
ENSCAFG00000032070	SAP18
ENSCAFG00000019277	NAA60
ENSCAFG00000001847	ZNF318
ENSCAFG00000019346	SRRM2
ENSCAFG00000014104	PCBD1
ENSCAFG00000001046	DESI1
ENSCAFG00000005396	CMTM6
ENSCAFG00000006101	ANKLE2
ENSCAFG00000017058	RARS
ENSCAFG00000009096	LXN
ENSCAFG00000013824	PHC1
ENSCAFG00000019003	CARHSP1
ENSCAFG00000018952	ARHGEF6
ENSCAFG00000016453	ADGRL1
ENSCAFG00000003341	TIA1
ENSCAFG00000015056	MAEA
ENSCAFG00000023107	OAS2
ENSCAFG00000010518	PKNOX1
ENSCAFG00000008483	NDRG4
ENSCAFG00000005348	EHD3
ENSCAFG00000002117	C2orf49
ENSCAFG00000024189	SERPINF1
ENSCAFG00000016547	UIMC1
ENSCAFG00000016048	PLEKHG3
ENSCAFG00000031752	UBE2G2
ENSCAFG00000009323	UEVLD
ENSCAFG00000029037	FBXO28
ENSCAFG00000029519	LDLRAP1
ENSCAFG00000007456	GLT8D2
ENSCAFG00000032422	RARRES1
ENSCAFG00000016762	PCGF3
ENSCAFG00000016405	TMEM132A
ENSCAFG00000019125	MTM1
ENSCAFG00000012727
ENSCAFG00000002818	ELP1
ENSCAFG00000020239	SH3GLB1
ENSCAFG00000030099	C1D
ENSCAFG00000013099	UCKL1
ENSCAFG00000003276	ANTXR1
ENSCAFG00000019632	DNAJC11
ENSCAFG00000030412	BCL2L11
ENSCAFG00000005576	SUPT16H
ENSCAFG00000003272	ELMO1
ENSCAFG00000013479	GABARAPL1
ENSCAFG00000016904	KHDC4
ENSCAFG00000029761	PRPF38B
ENSCAFG00000009410	ZDHHC13

[truncated: 30 more sheets: CA_Brown_gene(CA8), Con_Turquoise__gene(C1), Con_Yellow_gene(C2), Con_Blue_gene(C3), Con_Brown_gene(C4), Human_Turquoise_module(H1), Human_Blue_module(H2), Human_Brown_module(H3), Canine_Turquoise_module(CA1), Canine_Green_module(CA2), Canine_Red_module(CA3), Canine_Pink_module(CA4), Canine_Black_module(CA5), Canine_Yellow_module(CA6), Canine_Blue_module(CA7), Canine_Brown_module(CA8), Consensus_Turquoise_module(C1), Consensus_Yellow_module(C2), Consensus_Blue_module(C3), Consensus_Brown_module(C4) …]
